# Supplementary material for: A Comprehensive Evaluation of the Antibody-Verified Status of Eplets Listed in the HLA Epitope Registry
Source: Frontiers journal article supplement (doi:10.3389/fimmu.2021.800946), 2022-01-28
Supplement: Data_Sheet_2.pdf [file Data_Sheet_2.pdf]

## Supplementary Tables

|                                                                                                                                                   |    |
|---------------------------------------------------------------------------------------------------------------------------------------------------|----|
| <b>Supplementary Table 1.</b> Single antigen beads assay panel that was used for analysis.....                                                    | 2  |
| <b>Supplementary Table 2.</b> Complete overview of all HLA class I eplets that are considered antibody-verified by the HLA Epitope Registry.....  | 3  |
| <b>Supplementary Table 3.</b> Complete overview of all HLA class II eplets that are considered antibody-verified by the HLA Epitope Registry..... | 10 |
| <b>Supplementary Table 4.</b> Residue differences in reactivity patterns on Common HLA alleles.....                                               | 20 |
| <b>References</b> .....                                                                                                                           | 21 |

**Supplementary Table 1.** Single antigen beads assay panel that was used for analysis<sup>1</sup>

| HLA class I |         |         | HLA class II |                       |                       |
|-------------|---------|---------|--------------|-----------------------|-----------------------|
| A*01:01     | B*08:01 | B*51:01 | DRB1*01:01   | DRB3*01:01            | DQA1*05:01/DQB1*03:01 |
| A*02:01     | B*13:02 | B*52:01 | DRB1*01:02   | DRB3*02:02            | DQA1*05:01/DQB1*04:01 |
| A*02:02     | B*14:01 | B*53:01 | DRB1*01:03   | DRB3*03:01            | DQA1*06:01/DQB1*03:01 |
| A*02:03     | B*14:02 | B*54:01 | DRB1*03:01   | DRB4*01:01            | DQA1*06:01/DQB1*03:03 |
| A*02:05     | B*15:01 | B*55:01 | DRB1*03:02   | DRB5*01:01            | DQA1*06:01/DQB1*04:02 |
| A*03:01     | B*15:02 | B*56:01 | DRB1*03:03   | DRB5*02:02            | DPA1*01:03/DPB1*01:01 |
| A*11:01     | B*15:03 | B*57:01 | DRB1*04:01   | DQA1*01:01/DQB1*05:01 | DPA1*01:03/DPB1*02:01 |
| A*11:02     | B*15:12 | B*58:01 | DRB1*04:02   | DQA1*01:02/DQB1*05:01 | DPA1*01:03/DPB1*03:01 |
| A*23:01     | B*15:13 | B*59:01 | DRB1*04:03   | DQA1*01:02/DQB1*05:02 | DPA1*01:03/DPB1*04:01 |
| A*24:02     | B*15:16 | B*67:01 | DRB1*04:04   | DQA1*01:02/DQB1*06:02 | DPA1*01:03/DPB1*04:02 |
| A*24:03     | B*15:18 | B*73:01 | DRB1*04:05   | DQA1*01:02/DQB1*06:04 | DPA1*01:03/DPB1*06:01 |
| A*25:01     | B*18:01 | B*78:01 | DRB1*07:01   | DQA1*01:03/DQB1*06:01 | DPA1*01:03/DPB1*18:01 |
| A*26:01     | B*27:03 | B*81:01 | DRB1*08:01   | DQA1*01:03/DQB1*06:03 | DPA1*02:01/DPB1*01:01 |
| A*29:01     | B*27:05 | B*82:02 | DRB1*08:02   | DQA1*01:04/DQB1*05:03 | DPA1*02:01/DPB1*04:01 |
| A*29:02     | B*27:08 | C*01:02 | DRB1*09:01   | DQA1*01:04/DQB1*06:01 | DPA1*02:01/DPB1*05:01 |
| A*30:01     | B*35:01 | C*02:02 | DRB1*10:01   | DQA1*02:01/DQB1*02:01 | DPA1*02:01/DPB1*09:01 |
| A*31:01     | B*35:08 | C*03:03 | DRB1*11:01   | DQA1*02:01/DQB1*02:02 | DPA1*02:01/DPB1*11:01 |
| A*32:01     | B*37:01 | C*03:04 | DRB1*11:03   | DQA1*02:01/DQB1*03:02 | DPA1*02:01/DPB1*13:01 |
| A*33:01     | B*38:01 | C*04:01 | DRB1*11:04   | DQA1*02:01/DQB1*04:01 | DPA1*02:01/DPB1*14:01 |
| A*33:03     | B*39:01 | C*04:03 | DRB1*12:01   | DQA1*02:01/DQB1*06:01 | DPA1*02:01/DPB1*15:01 |
| A*34:02     | B*40:01 | C*05:01 | DRB1*12:02   | DQA1*03:01/DQB1*03:01 | DPA1*02:01/DPB1*17:01 |
| A*36:01     | B*40:02 | C*06:02 | DRB1*13:01   | DQA1*03:01/DQB1*03:02 | DPA1*02:01/DPB1*19:01 |
| A*43:01     | B*41:01 | C*07:01 | DRB1*13:03   | DQA1*03:01/DQB1*04:02 | DPA1*02:02/DPB1*01:01 |
| A*66:01     | B*42:01 | C*07:02 | DRB1*13:05   | DQA1*03:02/DQB1*02:02 | DPA1*02:02/DPB1*04:01 |
| A*66:02     | B*44:02 | C*08:01 | DRB1*14:01   | DQA1*03:02/DQB1*03:01 | DPA1*02:02/DPB1*05:01 |
| A*68:01     | B*44:03 | C*08:02 | DRB1*14:03   | DQA1*03:02/DQB1*03:02 | DPA1*02:02/DPB1*28:01 |
| A*68:02     | B*45:01 | C*12:02 | DRB1*14:04   | DQA1*03:02/DQB1*03:03 | DPA1*03:01/DPB1*01:01 |
| A*69:01     | B*46:01 | C*14:02 | DRB1*15:01   | DQA1*04:01/DQB1*03:03 | DPA1*03:01/DPB1*04:01 |
| A*74:01     | B*47:01 | C*15:02 | DRB1*15:02   | DQA1*04:01/DQB1*04:01 | DPA1*03:01/DPB1*04:02 |
| A*80:01     | B*48:01 | C*16:01 | DRB1*15:03   | DQA1*04:01/DQB1*04:02 | DPA1*03:01/DPB1*05:01 |
| B*07:02     | B*49:01 | C*17:01 | DRB1*16:01   | DQA1*05:01/DQB1*02:01 | DPA1*04:01/DPB1*04:01 |
| B*07:03     | B*50:01 | C*18:01 | DRB1*16:02   | DQA1*05:01/DQB1*02:02 | DPA1*04:01/DPB1*13:01 |

<sup>1</sup>Immucor single antigen bead assay HLA class I lot 3005842, 3009007, 3009260, 3009478, 3009741, 3010277 and class II lot 3009113.

**Supplementary Table 2.** Complete overview of all HLA class I eplets that are considered antibody-verified by the HLA Epitope Registry

| Eplet       | Polymorphic residue                  | Reference                                                                                                                                                             | Level of evidence <sup>1</sup> | Additional remarks                                                                                                                       |
|-------------|--------------------------------------|-----------------------------------------------------------------------------------------------------------------------------------------------------------------------|--------------------------------|------------------------------------------------------------------------------------------------------------------------------------------|
| 21H         | 21H                                  | El-Awar et al. 2007 Transplantation                                                                                                                                   | A2                             |                                                                                                                                          |
| 41T         | 41T                                  | El-Awar et al. 2007 Hum Immunol                                                                                                                                       | A2                             |                                                                                                                                          |
|             |                                      | Duquesnoy et al. 2012 Hum Immunol                                                                                                                                     | A1                             |                                                                                                                                          |
|             |                                      | Duquesnoy et al. 2016 Int J Immunogenet                                                                                                                               | B                              |                                                                                                                                          |
|             |                                      | Fernandez-Vina et al. 2006 Immunobiology of the Human MHC - Proceedings of the 13th International Histocompatibility Workshop and Conference - Volume I               | A1                             | This publication is not peer-reviewed.                                                                                                   |
| <u>44KM</u> | 44K 45M (149A 150V1 51H 152A) (158V) | El-Awar et al. 2007 Hum Immunol                                                                                                                                       | D                              | Eplet definition in this publication: 44K/150V/158V.                                                                                     |
|             |                                      | Fernandez-Vina et al. 2006 Immunobiology of the Human MHC - Proceedings of the 13th International Histocompatibility Workshop and Conference - Volume I               | A1                             | This publication is not peer-reviewed.                                                                                                   |
|             |                                      | Tongio et al. 1997 HLA: Genetic diversity of HLA: Functional and Medical Implications Volume 1 - Proceedings of the Twelfth International Histocompatibility Workshop | D                              | This publication is not peer-reviewed.                                                                                                   |
|             |                                      | HLA Epitope Registry website*                                                                                                                                         | A1                             | Proposed new reactivity pattern definition: 44K/150V/158V, based on SAB analysis of human mAb VDK1D12 (Figure 2C).                       |
| 44RMA       | 44R 45M 46A                          | El-Awar et al. 2010 Hum Immunol                                                                                                                                       | D                              | Eplet definition in this publication: 46A.                                                                                               |
|             |                                      | Duquesnoy et al. 2016 Int J Immunogenet                                                                                                                               | B                              |                                                                                                                                          |
| 44RT        | 44R 45T                              | El-Awar et al. 2007 Transplantation                                                                                                                                   | D                              | Eplet definition in this publication: 45T.                                                                                               |
| 45KE        | 45K 46E                              | Cauquil et al. 2018 Hla                                                                                                                                               | B                              |                                                                                                                                          |
| 56R         | 56R                                  | El-Awar et al. 2007 Transplantation                                                                                                                                   | A2                             |                                                                                                                                          |
|             |                                      | El-Awar et al. 2010 Hum Immunol                                                                                                                                       | D                              |                                                                                                                                          |
|             |                                      | Duquesnoy et al. 2016 Int J Immunogenet                                                                                                                               | X                              | This reference does not provide any evidence for the antibody-verification of eplet 56R.                                                 |
|             |                                      | Tongio et al. 1997 HLA: Genetic diversity of HLA: Functional and Medical Implications Volume 1 - Proceedings of the Twelfth International Histocompatibility Workshop | D                              | This publication is not peer-reviewed.                                                                                                   |
|             |                                      | Nelson et al. 1989 Immunobiology of HLA Volume I: Histocompatibility Testing                                                                                          | D                              | This publication is not peer-reviewed.                                                                                                   |
| 62EE        | 62E 63E                              | El-Awar et al. 2007 Transplantation                                                                                                                                   | D                              | Eplet definition in this publication: 62E.                                                                                               |
|             |                                      | Fernandez-Vina et al. 2006 Immunobiology of the Human MHC - Proceedings of the 13th International Histocompatibility Workshop and Conference - Volume I               | X                              | This reference does not provide evidence for the antibody-verification of eplet 62EE.                                                    |
|             |                                      | HLA Epitope Registry website                                                                                                                                          | X                              | Reactivity pattern analysis of human mAb BVK5C4 does not verify eplet 62EE but verifies eplet 166DG (Duquesnoy et al. 2013 Hum Immunol). |
| 62GE        | 62G 63E                              | Mulder et al. 2005 J Immunol                                                                                                                                          | X                              | This reference does not provide evidence for the antibody-verification of eplet 62GE.                                                    |
|             |                                      | Duquesnoy et al. 2013 Hum Immunol                                                                                                                                     | A1                             | This reference is not yet included in the HLA Epitope Registry for this eplet.                                                           |
|             |                                      | El-Awar et al. 2007 Hum Immunol                                                                                                                                       | A2                             | Eplet definition in this publication: 62G.                                                                                               |
|             |                                      | Fernandez-Vina et al. 2006 Immunobiology of the Human MHC - Proceedings of the 13th International                                                                     | A1                             | This publication is not peer-reviewed.                                                                                                   |

|       |                   |                                                                                                                                                                       |    |                                                                                                                    |
|-------|-------------------|-----------------------------------------------------------------------------------------------------------------------------------------------------------------------|----|--------------------------------------------------------------------------------------------------------------------|
|       |                   | Histocompatibility Workshop and Conference - Volume I                                                                                                                 |    |                                                                                                                    |
|       |                   | Tongio et al. 1997 HLA: Genetic diversity of HLA: Functional and Medical Implications Volume 1 - Proceedings of the Twelfth International Histocompatibility Workshop | D  | This publication is not peer-reviewed.                                                                             |
| 62GK  | 62G 66K (74H 77D) | El-Awar et al. 2007 Hum Immunol                                                                                                                                       | D  | Possible eplet is defined as 43Q+62G/62G+66K/62G+76V/62G+79G.                                                      |
|       |                   | Fernandez-Vina et al. 2006 Immunobiology of the Human MHC - Proceedings of the 13th International Histocompatibility Workshop and Conference - Volume I               | D  | This publication is not peer-reviewed.                                                                             |
|       |                   | Tongio et al. 1997 HLA: Genetic diversity of HLA: Functional and Medical Implications Volume 1 - Proceedings of the Twelfth International Histocompatibility Workshop | D  | This publication is not peer-reviewed.                                                                             |
|       |                   | Nelson et al. 1989 Immunobiology of HLA Volume I: Histocompatibility Testing                                                                                          | D  | This publication is not peer-reviewed.                                                                             |
| 62GRN | 62G 65R 66N       | Mulder et al. 1997 Hum Immunol                                                                                                                                        | C  |                                                                                                                    |
|       |                   | HLA Epitope Registry website                                                                                                                                          | X  | The analysis of human mAb SEE5G7 is solely published on the HLA Epitope Registry website and is not peer-reviewed. |
|       |                   | El-Awar et al. 2007 Transplantation                                                                                                                                   | D  | Possible eplet is defined as 43P+62G/ 41A+43P+62G/ 17R+41A+ 43P+62G/ 19E+41A+ 43P+62G.                             |
|       |                   | Tongio et al. 1997 HLA: Genetic diversity of HLA: Functional and Medical Implications Volume 1 - Proceedings of the Twelfth International Histocompatibility Workshop | C  | This publication is not peer-reviewed.                                                                             |
|       |                   | HLA Epitope Registry website*                                                                                                                                         | A1 | SAB analysis of human mAb VN2F1 verifies eplet 62GRN (Figure 1B).                                                  |
| 62LQ  | 62L 63Q           | El-Awar et al. 2007 Hum Immunol                                                                                                                                       | D  | Eplet definition in this publication: 62L.                                                                         |
|       |                   | HLA Epitope Registry website*                                                                                                                                         | A1 | SAB analysis of human mAb DK1G8 verifies eplet 62LQ (Figure 1A).                                                   |
|       |                   | Tongio et al. 1997 HLA: Genetic diversity of HLA: Functional and Medical Implications Volume 1 - Proceedings of the Twelfth International Histocompatibility Workshop | D  | This publication is not peer-reviewed.                                                                             |
| 62RR  | 62R 65R           | El-Awar et al. 2007 Transplantation                                                                                                                                   | D  |                                                                                                                    |
| 65GK  | 65G 66K           | El-Awar et al. 2007 Hum Immunol                                                                                                                                       | D  | Eplet definition in this publication: 65G.                                                                         |
|       |                   | HLA Epitope Registry website*                                                                                                                                         | X  | SAB analysis of human mAb VIE6C10 does not confirm the antibody-verification of 65GK (Figure 2A).                  |
|       |                   | HLA Epitope Registry website*                                                                                                                                         | A1 | SAB analysis of human mAb IND3H3 verifies eplet 65GK (Figure S1H).                                                 |
|       |                   | Nelson et al. 1989 Immunobiology of HLA Volume I: Histocompatibility Testing                                                                                          | D  | This publication is not peer-reviewed.                                                                             |
| 65QIA | 65Q 66I 69A       | El-Awar et al. 2007 Hum Immunol                                                                                                                                       | A2 | Eplet definition in this publication: 65Q+69A.                                                                     |
|       |                   | HLA Epitope Registry website*                                                                                                                                         | A1 | SAB analysis of human mAb VTM4D9 verifies eplet 65QIA (Figure S1C).                                                |
|       |                   | Tongio et al. 1997 HLA: Genetic diversity of HLA: Functional and Medical Implications Volume 1 - Proceedings of the Twelfth International Histocompatibility Workshop | D  | This publication is not peer-reviewed.                                                                             |
| 69AA  | 69A 71A           | El-Awar et al. 2007 Hum Immunol                                                                                                                                       | A2 | Eplet definition in this publication: 69A+43P.                                                                     |
| 69TNT | 69T 70N 71T       | Duquesnoy et al. 2016 Int J Immunogenet                                                                                                                               | B  |                                                                                                                    |
|       |                   | El-Awar et al. 2007 Hum Immunol                                                                                                                                       | A2 | Eplet definition in this publication: 69T.                                                                         |
| 70IAQ | 66I 69A 70Q       | Duquesnoy et al. 2016 Int J Immunogenet                                                                                                                               | B  |                                                                                                                    |
|       |                   | El-Awar et al. 2007 Hum Immunol                                                                                                                                       | A2 | Eplet definition in this publication: 65Q+69A+70Q.                                                                 |

|       |             |                                                                                                                                                         |    |                                                                                                      |
|-------|-------------|---------------------------------------------------------------------------------------------------------------------------------------------------------|----|------------------------------------------------------------------------------------------------------|
| 71ATD | 71A 73T 77D | El-Awar et al. 2007 Transplantation                                                                                                                     | D  | Possible eplet is defined as 65Q+69A+ 80T 65Q+ 69A+82L 65Q+69A+ 83R.                                 |
|       |             | Duquesnoy et al. 2016 Int J Immunogenet                                                                                                                 | B  |                                                                                                      |
| 71SA  | 70S 71A     | El-Awar et al. 2007 Hum Immunol                                                                                                                         | D  | Possible eplet is defined as 43P+65R/ 65R+163L/ 66N+131S/ 66N+163L.                                  |
| 71TTS | 71T 73T 77S | HLA Epitope Registry website*                                                                                                                           | A1 | SAB analysis of human mAb DMS4G2 verifies eplet 71TTS (Figure 1D).                                   |
|       |             | Fernandez-Vina et al. 2006 Immunobiology of the Human MHC - Proceedings of the 13th International Histocompatibility Workshop and Conference - Volume I | A1 | This publication is not peer-reviewed.                                                               |
| 73AN  | 73A 77N     | HLA Epitope Registry website                                                                                                                            | B  | This data is solely published on the HLA Epitope Registry website and is not peer-reviewed.          |
| 73TVS | 73T 76V 77S | Akaza et al. 2006 Clin Transpl                                                                                                                          | A2 | Possible eplet is defined as (73T)+76V+80N+90A in this study. This publication is not peer-reviewed. |
| 76ANT | 76A 77N 80T | Duquesnoy et al. 2016 Int J Immunogenet                                                                                                                 | B  |                                                                                                      |
|       |             | El-Awar et al. 2007 Hum Immunol                                                                                                                         | A2 | Eplet definition in this publication: 76A.                                                           |
| 76EG  | 76E 79G     | HLA Epitope Registry website                                                                                                                            | B  | This data is solely published on the HLA Epitope Registry website and is not peer-reviewed.          |
| 76ESI | 76E 77S 80I | HLA Epitope Registry website                                                                                                                            | B  | This data is solely published on the HLA Epitope Registry website and is not peer-reviewed.          |
|       |             | Vilella et al. 1983 Hum Immunol                                                                                                                         | D  |                                                                                                      |
|       |             | Nelson et al. 1989 Immunobiology of HLA Volume I: Histocompatibility Testing                                                                            | D  | This publication is not peer-reviewed                                                                |
|       |             | Fernandez-Vina et al. 2006 Immunobiology of the Human MHC - Proceedings of the 13th International Histocompatibility Workshop and Conference - Volume I | D  | This publication is not peer-reviewed                                                                |
| 76ESN | 76E 77S 80N | El-Awar et al. 2007 Hum Immunol                                                                                                                         | A2 | Possible eplet is defined as 76E+80N/76E+82R/76E+83G.                                                |
|       |             | Lutz et al. 1994 J Immunol                                                                                                                              | D  |                                                                                                      |
| 76VRN | 76V 79R 80N | Duquesnoy et al. 2016 Int J Immunogenet                                                                                                                 | B  |                                                                                                      |
|       |             | El-Awar et al. 2007 Transplantation                                                                                                                     | A2 | Possible eplet is defined as 76V+80N/73T+76V+79R.                                                    |
|       |             | HLA Epitope Registry website                                                                                                                            | B  | This data is published on the HLA Epitope Registry website and is not peer-reviewed.                 |
| 79GT  | 79G 80T     | Duquesnoy et al. 2016 Int J Immunogenet                                                                                                                 | B  |                                                                                                      |
| 80I   | 80I         | El-Awar et al. 2007 Hum Immunol                                                                                                                         | A2 |                                                                                                      |
|       |             | Duquesnoy et al. 2012 Hum Immunol                                                                                                                       | A1 |                                                                                                      |
| 80K   | 80K         | El-Awar et al. 2007 Transplantation                                                                                                                     | A2 | Eplet definition in this paper: 77N+80K.                                                             |
|       |             | Duquesnoy et al. 2011 Transpl Immunol                                                                                                                   | X  | This reference does not provide evidence for the antibody-verification of eplet 80K.                 |
|       |             | Bachelet et al. 2011 Am J Transplant                                                                                                                    | B  |                                                                                                      |
| 80N   | 80N         | El-Awar et al. 2007 Hum Immunol                                                                                                                         | A2 |                                                                                                      |
|       |             | Duquesnoy et al. 2012 Hum Immunol                                                                                                                       | A1 |                                                                                                      |
| 80TLR | 80T 82L 83R | El-Awar et al. 2007 Hum Immunol                                                                                                                         | A2 | Possible eplet is defined as 76E+80T/ 79R+80T/ 80T+82L/ 80T+83R.                                     |
| 82LR  | 82L 83R     | El-Awar et al. 2007 Hum Immunol                                                                                                                         | A2 |                                                                                                      |
|       |             | Duquesnoy et al. 2012 Hum Immunol                                                                                                                       | A1 |                                                                                                      |
|       |             | Duquesnoy et al. 2013 Hum Immunol                                                                                                                       | A1 | This reference is not yet included in the HLA Epitope Registry.                                      |
| 90D   | 90D         | Duquesnoy et al. 2016 Int J Immunogenet                                                                                                                 | B  |                                                                                                      |
|       |             | El-Awar et al. 2007 Hum Immunol                                                                                                                         | A2 |                                                                                                      |
| 107W  | 107W        | Mulder et al. 2005 J Immunol                                                                                                                            | C  |                                                                                                      |
|       |             | HLA Epitope Registry website*                                                                                                                           | A1 | SAB analysis of human mAb JOK3H4 verifies eplet 107W (Figure S1A).                                   |

|        |                |                                                                                                                                                                       |       |                                                                                                                                     |
|--------|----------------|-----------------------------------------------------------------------------------------------------------------------------------------------------------------------|-------|-------------------------------------------------------------------------------------------------------------------------------------|
|        |                | El-Awar et al. 2007 Hum Immunol                                                                                                                                       | D     |                                                                                                                                     |
|        |                | Fernandez-Vina et al. 2006 Immunobiology of the Human MHC - Proceedings of the 13th International Histocompatibility Workshop and Conference - Volume I               | D     | This publication is not peer-reviewed.                                                                                              |
|        |                | Tongio et al. 1997 HLA: Genetic diversity of HLA: Functional and Medical Implications Volume 1 - Proceedings of the Twelfth International Histocompatibility Workshop | D     | This publication is not peer-reviewed.                                                                                              |
|        |                | Nelson et al. 1989 Immunobiology of HLA Volume I: Histocompatibility Testing                                                                                          | D     | This publication is not peer-reviewed.                                                                                              |
|        |                | Layet et al. 1987 J Immunol                                                                                                                                           | D     |                                                                                                                                     |
| 127K   | 127K           | Duquesnoy et al. 2016 Int J Immunogenet                                                                                                                               | B     |                                                                                                                                     |
|        |                | El-Awar et al. 2007 Hum Immunol                                                                                                                                       | A2    |                                                                                                                                     |
|        |                | El-Awar et al. 2010 Hum Immunol                                                                                                                                       | D     |                                                                                                                                     |
|        |                | De Vito et al. 1993 Hum Immunol                                                                                                                                       | C     |                                                                                                                                     |
|        |                | Laundy et al. 2004 Transfusion                                                                                                                                        | B     |                                                                                                                                     |
| 131S   | 131S           | Duquesnoy et al. 2016 Int J Immunogenet                                                                                                                               | B     |                                                                                                                                     |
| 138K   | 138K           | Duquesnoy et al. 2011 Transpl Immunol                                                                                                                                 | B     |                                                                                                                                     |
| 138MI  | 138M 142I      | Duquesnoy et al. 2016 Int J Immunogenet                                                                                                                               | B     |                                                                                                                                     |
|        |                | HLA Epitope Registry website                                                                                                                                          | B     | This data is solely published on the HLA Epitope Registry website and is not peer-reviewed.                                         |
| 144K   | 144K           | El-Awar et al. 2007 Hum Immunol                                                                                                                                       | A2    |                                                                                                                                     |
|        |                | HLA Epitope Registry website                                                                                                                                          | B     | This data is published on the HLA Epitope Registry website and is not peer-reviewed.                                                |
| 144KR  | 144K 145R      | Duquesnoy et al. 2013 Hum Immunol                                                                                                                                     | A1    | This reference is not yet included in the HLA Epitope Registry for this eplet.                                                      |
|        |                | El-Awar et al. 2007 Hum Immunol                                                                                                                                       | A2    | Possible eplet is defined as 142I+144K/144K+145R.                                                                                   |
|        |                | Fernandez-Vina et al. 2006 Immunobiology of the Human MHC - Proceedings of the 13th International Histocompatibility Workshop and Conference - Volume I               | A1    | This publication is not peer-reviewed.                                                                                              |
| 144QL  | 144Q 145L      | HLA Epitope Registry website*                                                                                                                                         | A1    | SAB analysis of human mAb GK31F12 verifies eplet 144QL (Figure S1D).                                                                |
|        |                | El-Awar et al. 2007 Hum Immunol                                                                                                                                       | D     | Possible eplet is defined as 145L/41T+46A.                                                                                          |
|        |                | Mulder et al. 1997 Hum Immunol                                                                                                                                        | C     |                                                                                                                                     |
|        |                | Fernandez-Vina et al. 2006 Immunobiology of the Human MHC - Proceedings of the 13th International Histocompatibility Workshop and Conference - Volume I               | X     | This reference does not provide evidence for the antibody verification of 144QL.                                                    |
|        |                | Tongio et al. 1997 HLA: Genetic diversity of HLA: Functional and Medical Implications Volume 1 - Proceedings of the Twelfth International Histocompatibility Workshop | C & D | This publication is not peer-reviewed.                                                                                              |
|        |                | Nelson et al. 1989 Immunobiology of HLA Volume I: Histocompatibility Testing                                                                                          | D     | This publication is not peer-reviewed.                                                                                              |
| 144TKH | 142T 144K 145H | HLA Epitope Registry website*                                                                                                                                         | A1    | SAB analysis of human mAb SN607D8 verifies eplet 144TKH. (Figure 1C).                                                               |
|        |                | HLA Epitope Registry website                                                                                                                                          | X     | SAB analysis of human mAb SN66E3 does not confirm the antibody verification of eplet 144TKH, but verifies eplet 145KHA (Figure 2B). |
|        |                | El-Awar et al. 2007 Hum Immunol                                                                                                                                       | A2    | Possible eplet is defined as 142T/145H.                                                                                             |
|        |                | Fernandez-Vina et al. 2006 Immunobiology of the Human MHC - Proceedings of the 13th International                                                                     | A1    | This publication is not peer-reviewed.                                                                                              |

|         |                |                                                                                                                                                                       |         |                                                                                                  |
|---------|----------------|-----------------------------------------------------------------------------------------------------------------------------------------------------------------------|---------|--------------------------------------------------------------------------------------------------|
|         |                | Histocompatibility Workshop and Conference - Volume I                                                                                                                 |         |                                                                                                  |
|         |                | Mulder et al. 1997 Hum Immunol                                                                                                                                        | C       |                                                                                                  |
|         |                | Muller et al. 1983 Hum Immunol                                                                                                                                        | D       |                                                                                                  |
|         |                | Dessi et al. 1990 Hum Immunol                                                                                                                                         | C       |                                                                                                  |
|         |                | Tongio et al. 1997 HLA: Genetic diversity of HLA: Functional and Medical Implications Volume 1 - Proceedings of the Twelfth International Histocompatibility Workshop | D       | This publication is not peer-reviewed.                                                           |
|         |                | Nelson et al. 1989 Immunobiology of HLA Volume I: Histocompatibility Testing                                                                                          | D       | This publication is not peer-reviewed.                                                           |
| 145KHA  | 144K 145H 149A | Tongio et al. 1997 HLA: Genetic diversity of HLA: Functional and Medical Implications Volume 1 - Proceedings of the Twelfth International Histocompatibility Workshop | D       | This publication is not peer-reviewed.                                                           |
|         |                | Fernandez-Vina et al. 2006 Immunobiology of the Human MHC - Proceedings of the 13th International Histocompatibility Workshop and Conference - Volume I               | D       | This publication is not peer-reviewed.                                                           |
|         |                | Mulder et al. 1993 Tissue Antigens                                                                                                                                    | A1      | This eplet is also verified by SAB analysis of human mAb SN66E3 (Figure 2B).                     |
|         |                | Hogan et al. 1988 J Immunol                                                                                                                                           | D       |                                                                                                  |
| 145RT   | 145R 149T      | Duquesnoy et al. 2016 Int J Immunogenet                                                                                                                               | B       |                                                                                                  |
|         |                | El-Awar et al. 2007 Hum Immunol                                                                                                                                       | D       | Possible eplet is defined as (9Y)+149T/ (74D)+149T.                                              |
| 149TAH  | 149T 150A 151H | El-Awar et al. 2007 Transplantation                                                                                                                                   | A2      | Eplet definition in this publication: 149T.                                                      |
| 150AAH  | 149A 150A 151H | El-Awar et al. 2010 Hum Immunol                                                                                                                                       | D       |                                                                                                  |
| 151AHA  | 150A 151H 152A | HLA Epitope Registry website*                                                                                                                                         | A1      | SAB analysis of human mAb MUL6D1 verifies eplet 151AHA (Figure S1E).                             |
|         |                | El-Awar et al. 2007 Transplantation                                                                                                                                   | A2      | Possible eplet is defined as 149A+150A+ 163R/ 149A+158A+ 163R/149A+163R+ 166E/ 149A+ 163R+ 167W. |
| 156DA   | 156D 158A      | Lomago et al. 2010 Hum Immunol                                                                                                                                        | B       |                                                                                                  |
| 158T    | 158T           | El-Awar et al. 2007 Hum Immunol                                                                                                                                       | D       |                                                                                                  |
|         |                | Ge et al. 1993 Hum Immunol                                                                                                                                            | C       |                                                                                                  |
| 161D    | 161D           | HLA Epitope Registry website*                                                                                                                                         | A1      | SAB analysis of human mAb OK2F3 verifies eplet 161D (Figure S1B).                                |
|         |                | El-Awar et al. 2007 Hum Immunol                                                                                                                                       | D       |                                                                                                  |
|         |                | Fernandez-Vina et al. 2006 Immunobiology of the Human MHC - Proceedings of the 13th International Histocompatibility Workshop and Conference - Volume I               | A1      | This publication is not peer-reviewed.                                                           |
|         |                | Tongio et al. 1997 HLA: Genetic diversity of HLA: Functional and Medical Implications Volume 1 - Proceedings of the Twelfth International Histocompatibility Workshop | C and D | This publication is not peer-reviewed.                                                           |
|         |                | Nelson et al. 1989 Immunobiology of HLA Volume I: Histocompatibility Testing                                                                                          | D       | This publication is not peer-reviewed.                                                           |
| 163EW   | 163E 167W      | El-Awar et al. 2007 Hum Immunol                                                                                                                                       | A2      | Possible eplet defined as 163E+166E/163E+167W.                                                   |
| 163LS/G | 163L 167G/S    | HLA Epitope Registry website                                                                                                                                          | B       | This data is solely published on the HLA Epitope Registry website and is not peer-reviewed.      |
|         |                | *                                                                                                                                                                     | A1      | SAB analysis of human mAb DK7C11 verifies eplet 163L 167G/S (Figure 3).                          |
| 163LW   | 163L 167W      | Duquesnoy et al. 2012 Hum Immunol                                                                                                                                     | A1      |                                                                                                  |

|              |                  |                                                                                                                                                         |    |                                                                                                                                                                        |
|--------------|------------------|---------------------------------------------------------------------------------------------------------------------------------------------------------|----|------------------------------------------------------------------------------------------------------------------------------------------------------------------------|
|              |                  | Duquesnoy et al. 2013 Hum Immunol                                                                                                                       | A1 | This reference is not yet included in the HLA Epitope Registry for this eplet.                                                                                         |
|              |                  | El-Awar et al. 2007 Transplantation                                                                                                                     | A2 |                                                                                                                                                                        |
|              |                  | Mulder et al. 1997 Hum Immunol                                                                                                                          | C  |                                                                                                                                                                        |
|              |                  | Fernandez-Vina et al. 2006 Immunobiology of the Human MHC - Proceedings of the 13th International Histocompatibility Workshop and Conference - Volume I | A1 | This publication is not peer-reviewed.                                                                                                                                 |
| 163R         | 163R             | El-Awar et al. 2007 Hum Immunol                                                                                                                         | A2 |                                                                                                                                                                        |
|              |                  | Laundy et al. 2004 Transfusion                                                                                                                          | B  |                                                                                                                                                                        |
| 163RG        | 163R 167G        | HLA Epitope Registry website*                                                                                                                           | A1 | SAB analysis of human mAb GV2D5 verifies eplet 163RG (Figure S1F).                                                                                                     |
|              |                  | Fernandez-Vina et al. 2006 Immunobiology of the Human MHC - Proceedings of the 13th International Histocompatibility Workshop and Conference - Volume I | D  | This publication is not peer-reviewed.                                                                                                                                 |
|              |                  | El-Awar et al. 2009 Clin Transpl                                                                                                                        | B  | Eplet definition in this publication: 158V+163R. This reference is not yet included in the HLA Epitope Registry for this eplet. This publication is not peer-reviewed. |
| 163RW        | 163R 167W        | HLA Epitope Registry website*                                                                                                                           | A1 | SAB analysis of human mAb VP5G3 verifies eplet 163RW (Figure S1G).                                                                                                     |
|              |                  | Mulder et al. 1998 Tissue Antigens                                                                                                                      | C  |                                                                                                                                                                        |
|              |                  | El-Awar et al. 2007 Hum Immunol                                                                                                                         | A2 | Possible eplet defined as 163R+166E/ 158A+163R/ 163R+167W.                                                                                                             |
|              |                  | Fernandez-Vina et al. 2006 Immunobiology of the Human MHC - Proceedings of the 13th International Histocompatibility Workshop and Conference - Volume I | A1 | This publication is not peer-reviewed.                                                                                                                                 |
| 166DG        | 166D 167G        | El-Awar et al. 2007 Hum Immunol                                                                                                                         | A2 | Eplet definition in this publication: 166D/167G.                                                                                                                       |
|              |                  | Fernandez-Vina et al. 2006 Immunobiology of the Human MHC - Proceedings of the 13th International Histocompatibility Workshop and Conference - Volume I | D  | This publication is not peer-reviewed.                                                                                                                                 |
|              |                  | HLA Epitope Registry website                                                                                                                            | B  | This data is solely published on the HLA Epitope Registry website and is not peer-reviewed.                                                                            |
|              |                  | Duquesnoy et al. 2013 Hum Immunol                                                                                                                       | A1 | This reference is not yet included in the HLA Epitope Registry for this eplet.                                                                                         |
| 173K         | 173K             | Akaza et al. 2006 Clin Transpl                                                                                                                          | B  | Eplet definition in this publication: 163L+173K. This publication is not peer-reviewed.                                                                                |
|              |                  | Duquesnoy et al. 2011 Transpl Immunol                                                                                                                   | B  |                                                                                                                                                                        |
| 177KT        | 177K 178T        | El-Awar et al. 2007 Transplantation                                                                                                                     | A2 |                                                                                                                                                                        |
|              |                  | Duquesnoy et al. 2011 Transpl Immunol                                                                                                                   | B  |                                                                                                                                                                        |
|              |                  | HLA Epitope Registry website                                                                                                                            | B  | This data is solely published on the HLA Epitope Registry website and is not peer-reviewed.                                                                            |
| 180E         | 180E             | El-Awar et al. 2007 Hum Immunol                                                                                                                         | A2 | Eplet definition in this paper: 177D/180E.                                                                                                                             |
|              |                  | HLA Epitope Registry website                                                                                                                            | B  | This data is solely published on the HLA Epitope Registry website and is not peer-reviewed.                                                                            |
| <u>193PL</u> | 193P 194L (273S) | El-Awar et al. 2007 Hum Immunol                                                                                                                         | A2 | Eplet definition in this paper: 194L. Proposed reactivity pattern definition based on re-analysis of SAB data from this publication: 193P+194L / 273S.                 |
|              |                  | Duquesnoy et al. 2011 Transpl Immunol                                                                                                                   | B  |                                                                                                                                                                        |
| 193PV        | 193P 194V        | Adeyi et al. 2005 Transpl Immunol                                                                                                                       | B  |                                                                                                                                                                        |
| 219W         | 219W             | Duquesnoy et al. 2013 Hum Immunol                                                                                                                       | A1 | This reference is not yet included in the HLA Epitope Registry for this eplet.                                                                                         |
|              |                  | Fernandez-Vina et al. 2006 Immunobiology of the Human MHC - Proceedings of the 13th International                                                       | X  | This reference does not provide evidence for the antibody verification of 219W. This publication is not peer-reviewed.                                                 |



|       |                 |                                                                    |    |                                                                                                                       |
|-------|-----------------|--------------------------------------------------------------------|----|-----------------------------------------------------------------------------------------------------------------------|
|       |                 | Histocompatibility Workshop and Conference - Volume I <sup>†</sup> |    |                                                                                                                       |
|       |                 | El-Awar et al. 2009 Clin Transpl                                   | B  | This reference is not yet included in the HLA Epitope Registry for this eplet. This publication is not peer-reviewed. |
| 248M  | 248M (6K) (99C) | HLA Epitope Registry website                                       | B  | This data is solely published on the HLA Epitope Registry website and is not peer-reviewed.                           |
| 253Q  | 253Q            | El-Awar et al. 2007 Transplantation                                | A2 |                                                                                                                       |
|       |                 | HLA Epitope Registry website                                       | B  | This data is published on the HLA Epitope Registry website and is not peer-reviewed.                                  |
| 267QE | 267Q 268E       | El-Awar et al. 2007 Transplantation                                | A2 | Eplet definition in this paper: 267Q.                                                                                 |

<sup>†</sup>A1, Human monoclonal antibody + single antigen bead (SAB) assay and/or complement dependent cytotoxicity assay (CDC) with high resolution HLA typed cells; A2, Adsorption and elution studies + SAB and/or CDC with high resolution HLA typed cells; B, Patient serum tested in SAB; C, Human monoclonal antibody or adsorption and elution studies or patient sera tested with serologically typed cells; D, Other species (e.g. murine monoclonal antibody).

\*Single antigen bead analysis of this human mAb is provided in this paper.

Underlined: The residues of these eplets exceed the 3.5 Ångstrom radius and we therefore propose to consider these eplets as antibody-verified reactivity patterns. See Table 7 for proposed definitions and rationale.

**Supplementary Table 3.** Complete overview of all HLA class II eplets that are considered antibody-verified by the HLA Epitope Registry

| Antigen | Eplet | Polymorphic residue | Reference                                                                                                                                                                | Level of evidence <sup>1</sup> | Additional remarks                                                                                                                                                                                                                                                                            |
|---------|-------|---------------------|--------------------------------------------------------------------------------------------------------------------------------------------------------------------------|--------------------------------|-----------------------------------------------------------------------------------------------------------------------------------------------------------------------------------------------------------------------------------------------------------------------------------------------|
| DRB     | 4Q    | 4Q                  | HLA Epitope Registry website                                                                                                                                             | B                              | This data is solely published on the HLA Epitope Registry website and is not peer-reviewed.                                                                                                                                                                                                   |
|         |       |                     | Knowles et al. 1986 J Immunol                                                                                                                                            | D                              |                                                                                                                                                                                                                                                                                               |
|         |       |                     | Knowles 1989 Immunobiology of HLA Volume I: Histocompatibility Testing                                                                                                   | D                              | This publication is not peer-reviewed.                                                                                                                                                                                                                                                        |
|         |       |                     | Lardy et al. 1991 Hum Immunol                                                                                                                                            | D                              |                                                                                                                                                                                                                                                                                               |
|         |       |                     | Fu et al. 1992 Hum Immunol                                                                                                                                               | D                              |                                                                                                                                                                                                                                                                                               |
|         |       |                     | Cai et al. 2006 Clin Transpl                                                                                                                                             | B                              | This publication is not peer-reviewed.                                                                                                                                                                                                                                                        |
|         |       |                     | Cai et al. 2006 Am J Transplant                                                                                                                                          | B                              |                                                                                                                                                                                                                                                                                               |
| DRB     | 4R    | 4R                  | Marsh et al. 1989 Immunol Today                                                                                                                                          | D                              |                                                                                                                                                                                                                                                                                               |
|         |       |                     | Ogasawara et al. 1985 Tissue Antigens                                                                                                                                    | D                              |                                                                                                                                                                                                                                                                                               |
|         |       |                     | Fu et al. 1992 Hum Immunol                                                                                                                                               | D                              |                                                                                                                                                                                                                                                                                               |
|         |       |                     | Fu et al. 1994 Hum Immunol                                                                                                                                               | D                              |                                                                                                                                                                                                                                                                                               |
| DRB     | 11ST5 | 9E 10Y 11S 12T 13S  | Cai et al. 2006 Am J Transplant                                                                                                                                          | X                              | This publication defines the potential eplets as 11S/12T/13S using adsorption and elution of alloantibodies from patient sera. This eplet is considered not antibody-verified because it is found on the bottom of the peptide-binding groove and therefore cannot induce antibody-formation. |
|         |       |                     | Heyes et al. 1992 HLA 1991 - Proceedings of the Eleventh International Histocompatibility Workshop and Conference – Volume 2                                             | X                              | This publication includes murine mAb analysis and is not peer-reviewed. This eplet is considered not antibody-verified because it is found on the bottom of the peptide-binding groove and therefore cannot induce antibody-formation.                                                        |
|         |       |                     | Navarette et al. 1997 HLA: Genetic diversity of HLA: Functional and Medical Implications Volume 1 - Proceedings of the Twelfth International Histocompatibility Workshop | X                              | This publication includes murine mAb analysis and is not peer-reviewed. This eplet is considered not antibody-verified because it is found on the bottom of the peptide-binding groove and therefore cannot induce antibody-formation.                                                        |
| DRB     | 13FE  | 13F 14E             | Cai et al. 2006 Clin Transpl                                                                                                                                             | B                              | This publication defines this eplet as 13F. This publication is not peer-reviewed.                                                                                                                                                                                                            |
|         |       |                     | Cayrol et al. 1992 Tissue Antigens                                                                                                                                       | D                              |                                                                                                                                                                                                                                                                                               |
|         |       |                     | Cayrol et al. 1995 Hum Immunol                                                                                                                                           | D                              |                                                                                                                                                                                                                                                                                               |
| DRB     | 16Y   | 16Y 25R             | HLA Epitope Registry website                                                                                                                                             | B                              | This data is solely published on the HLA Epitope Registry website and is not peer-reviewed.                                                                                                                                                                                                   |
|         |       |                     | Pistillo et al. 1991 Hum Immunol                                                                                                                                         | C                              |                                                                                                                                                                                                                                                                                               |
|         |       |                     | Navarette et al. 1997 HLA: Genetic diversity of HLA: Functional and Medical Implications Volume 1 - Proceedings of the Twelfth International Histocompatibility Workshop | A1                             | This publication defines this eplet as 13G 14E 15C 16Y. This publication is not peer-reviewed.                                                                                                                                                                                                |
|         |       |                     | Nakayama et al. 1987 Hum Immunol                                                                                                                                         | D                              |                                                                                                                                                                                                                                                                                               |
|         |       |                     | Cai et al. 2006 Clin Transpl                                                                                                                                             | B                              | This publication defines the potential eplets as 13G/16Y. This publication is not peer-reviewed.                                                                                                                                                                                              |
| DRB     | 25Q   | 25Q 30L 14K         | Nelson et al. 1989 Immunobiology of HLA Volume I: Histocompatibility Testing                                                                                             | D                              | This publication is not peer-reviewed.                                                                                                                                                                                                                                                        |
|         |       |                     | Kennedy et al. 1989 Immunobiology of HLA Volume I: Histocompatibility Testing                                                                                            | D                              | This publication is not peer-reviewed.                                                                                                                                                                                                                                                        |
|         |       |                     | Fu et al. 1995 Hum Immunol                                                                                                                                               | D                              |                                                                                                                                                                                                                                                                                               |
|         |       |                     | Navarette et al. 1997 HLA: Genetic diversity of HLA: Functional and Medical Implications Volume 1 -                                                                      | D                              | This publication is not peer-reviewed.                                                                                                                                                                                                                                                        |

|     |             |                             |                                                                                                                                                                          |    |                                                                                                                                                     |
|-----|-------------|-----------------------------|--------------------------------------------------------------------------------------------------------------------------------------------------------------------------|----|-----------------------------------------------------------------------------------------------------------------------------------------------------|
|     |             |                             | Proceedings of the Twelfth International Histocompatibility Workshop                                                                                                     |    |                                                                                                                                                     |
|     |             |                             | Cai et al. 2006 Clin Transpl                                                                                                                                             | B  | This publication defines the potential eplets as 11G/14K/25Q/30L. This publication is not peer-reviewed.                                            |
|     |             |                             | Kramer et al. 2020 Am J Transplant                                                                                                                                       | A1 | This reference is not yet included in the HLA Epitope Registry for this eplet. This study defines this eplet as 14K 25Q.                            |
| DRB | 25R         | 25R                         | Marsh et al. 1989 Immunol Today                                                                                                                                          | D  |                                                                                                                                                     |
|     |             |                             | Nelson et al. 1989 Immunobiology of HLA Volume I: Histocompatibility Testing                                                                                             | D  | This publication is not peer-reviewed.                                                                                                              |
|     |             |                             | Kennedy et al. 1989 Immunobiology of HLA Volume I: Histocompatibility Testing                                                                                            | D  | This publication is not peer-reviewed.                                                                                                              |
|     |             |                             | Inoko et al. 1992 HLA 1991 - Proceedings of the Eleventh International Histocompatibility Workshop and Conference – Volume 1                                             | D  | This publication is not peer-reviewed.                                                                                                              |
|     |             |                             | Fu et al. 1995 Hum Immunol                                                                                                                                               | D  |                                                                                                                                                     |
| DRB | 30C         | 30C                         | Wölpl et al. 1998 Tissue Antigens                                                                                                                                        | X  | This literature reference does not confirm the antibody verification of eplet 30C, because the human mAb UL-5A1 is peptide-dependent.               |
|     |             |                             | Löffler et al. 1998 Eur J Immunogenet                                                                                                                                    | X  | This literature reference does not confirm the antibody verification of eplet 30C, because the human mAbs UL-5A1 and Fab-5A1 are peptide-dependent. |
| DRB | 30RV        | 30R 31V 10E                 | Navarette et al. 1997 HLA: Genetic diversity of HLA: Functional and Medical Implications Volume 1 - Proceedings of the Twelfth International Histocompatibility Workshop | D  | This publication is not peer-reviewed.                                                                                                              |
| DRB | <b>31FY</b> | <b>31F 32Y</b>              | Kramer et al. 2020 Am J Transplant                                                                                                                                       | A1 | This study defines this eplet as 31F 32Y 37Y/S. Eplet 31FY was not considered antibody-verified by the HLA Epitope Registry yet.                    |
| DRB | 37L         | 37L                         | HLA Epitope Registry website                                                                                                                                             | B  | This data is solely published on the HLA Epitope Registry website and is not peer-reviewed.                                                         |
|     |             |                             | Cai et al. 2006 Clin Transpl                                                                                                                                             | D  | This reference is not yet included in the HLA Epitope Registry for this eplet. This publication is not peer-reviewed.                               |
| DRB | 37YV        | 37Y 38V                     | Ge et al. 1995 Hum Immunol                                                                                                                                               | X  | This literature reference does not confirm antibody verification of eplet 37YV, but of eplet 31FY (A1 evidence).                                    |
|     |             |                             | Marsh et al. 1992 HLA 1991 - Proceedings of the Eleventh International Histocompatibility Workshop and Conference – Volume 1                                             | C  | This publication is not peer-reviewed.                                                                                                              |
|     |             |                             | Duquesnoy et al. 2016 Hum Immunol                                                                                                                                        | X  | This literature reference does not confirm antibody verification of eplet 37YV, but of eplet 31FY (B evidence).                                     |
|     |             |                             | Bunce et al. 1990 Tissue Antigens                                                                                                                                        | C  |                                                                                                                                                     |
| DRB | 47F         | 47F 48R                     | Cai et al. 2006 Clin Transpl                                                                                                                                             | B  | This publication defines this eplet as 47F. This publication is not peer-reviewed.                                                                  |
|     |             |                             | Duquesnoy et al. 2016 Hum Immunol                                                                                                                                        | B  |                                                                                                                                                     |
| DRB | 48Q         | 48Q 18L 25W 26N 41N 44L 81Y | Kosinski et al. 1986 Tissue Antigens                                                                                                                                     | C  |                                                                                                                                                     |
|     |             |                             | Knowles et al. 1986 J Immunol                                                                                                                                            | D  |                                                                                                                                                     |
|     |             |                             | Nelson et al. 1989 Immunobiology of HLA Volume I: Histocompatibility Testing                                                                                             | D  | This publication is not peer-reviewed.                                                                                                              |
|     |             |                             | Kennedy et al. 1989 Immunobiology of HLA Volume I: Histocompatibility Testing                                                                                            | D  | This publication is not peer-reviewed.                                                                                                              |

|     |             |                |                                                                                                                                                                          |    |                                                                                                                                                                   |
|-----|-------------|----------------|--------------------------------------------------------------------------------------------------------------------------------------------------------------------------|----|-------------------------------------------------------------------------------------------------------------------------------------------------------------------|
| DRB | 51R         | 51R            | Berte et al. 1989 Immunobiology of HLA Volume II: Immunogenetics and Histocompatibility                                                                                  | D  | This publication is not peer-reviewed.                                                                                                                            |
|     |             |                | Fuggle et al. 1989 Tissue Antigens                                                                                                                                       | D  |                                                                                                                                                                   |
|     |             |                | HLA Epitope Registry website                                                                                                                                             | B  | This data is solely published on the HLA Epitope Registry website and is not peer-reviewed.                                                                       |
| DRB | 57DE        | 57D 58E        | HLA Epitope Registry website*                                                                                                                                            | A1 | SAB analysis of human mAb VR1H5 verifies eplet 57DE (Figure 4A).                                                                                                  |
|     |             |                | Hancock et al. 1988 Hum Immunol                                                                                                                                          | C  |                                                                                                                                                                   |
|     |             |                | Pistillo et al. 1991 Hum Immunol                                                                                                                                         | C  |                                                                                                                                                                   |
|     |             |                | Pistillo et al. 1992 Hum Immunol                                                                                                                                         | C  |                                                                                                                                                                   |
|     |             |                | Knowles 1989 Immunobiology of HLA Volume I: Histocompatibility Testing                                                                                                   | D  | This publication is not peer-reviewed.                                                                                                                            |
|     |             |                | Marsh et al. 1989 Immunol Today                                                                                                                                          | D  |                                                                                                                                                                   |
|     |             |                | Nelson et al. 1989 Immunobiology of HLA Volume I: Histocompatibility Testing                                                                                             | D  | This publication is not peer-reviewed.                                                                                                                            |
|     |             |                | Klohe et al. 1992 Hum Immunol                                                                                                                                            | X  | The panel of cells used in this study is not sufficient for eplet analysis.                                                                                       |
|     |             |                | Navarette et al. 1997 HLA: Genetic diversity of HLA: Functional and Medical Implications Volume 1 - Proceedings of the Twelfth International Histocompatibility Workshop | C  | This publication is not peer-reviewed.                                                                                                                            |
| DRB | 57S         | 57S 58A 60Y    | Cai et al. 2006 Clin Transpl                                                                                                                                             | D  | This publication defines this eplet as 58E. This publication is not peer-reviewed.                                                                                |
|     |             |                |                                                                                                                                                                          | B  | This publication defines this eplet as 57S. This reference is not yet included in the HLA Epitope Registry for this eplet and is not peer-reviewed.               |
|     |             |                |                                                                                                                                                                          |    |                                                                                                                                                                   |
| DRB | 57V         | 57V 58A 60S    | HLA Epitope Registry website                                                                                                                                             | B  | This data is solely published on the HLA Epitope Registry website and is not peer-reviewed.                                                                       |
|     |             |                | Cai et al. 2006 Clin Transpl                                                                                                                                             | B  | This publication defines the potential eplets as 57V/60S. This reference is not yet included in the HLA Epitope Registry for this eplet and is not peer-reviewed. |
| DRB | 70D         | 70D            | Sadler et al. 1993 Tissue Antigens                                                                                                                                       | D  |                                                                                                                                                                   |
|     |             |                | Duquesnoy et al. 2016 Hum Immunol                                                                                                                                        | B  |                                                                                                                                                                   |
|     |             |                | Cai et al. 2006 Clin Transpl                                                                                                                                             | B  | This publication is not peer-reviewed.                                                                                                                            |
| DRB | 70DA        | 70D 73A        | Duquesnoy et al. 2016 Hum Immunol                                                                                                                                        | B  |                                                                                                                                                                   |
| DRB | <b>70QA</b> | <b>70Q 73A</b> | Kramer et al. 2020 Am J Transplant                                                                                                                                       | A1 | Eplet 70QA is not considered antibody-verified yet by the HLA Epitope Registry.                                                                                   |
| DRB | 70QT        | 70Q 77T        | Drover et al. 1994 Hum Immunol                                                                                                                                           | D  |                                                                                                                                                                   |
|     |             |                | Inoko et al. 1992 HLA 1991 - Proceedings of the Eleventh International Histocompatibility Workshop and Conference – Volume 1                                             | D  | This publication is not peer-reviewed.                                                                                                                            |
|     |             |                | Drover et al. 1992 HLA 1991 - Proceedings of the Eleventh International Histocompatibility Workshop and Conference – Volume 2                                            | D  | This publication is not peer-reviewed.                                                                                                                            |
|     |             |                | Drover et al. 1994 Scand J Immunol                                                                                                                                       | D  |                                                                                                                                                                   |
| DRB | 70R         | 70R 71R        | Cai et al. 2006 Clin Transpl                                                                                                                                             | D  | This publication defines this eplet as 70R. This publication is not peer-reviewed.                                                                                |
|     |             |                | HLA Epitope Registry website                                                                                                                                             | B  | This data is solely published on the HLA Epitope Registry website and is not peer-reviewed.                                                                       |
| DRB | 73A         | 73A 77T        | Cayrol et al. 1992 Tissue Antigens                                                                                                                                       | D  |                                                                                                                                                                   |
|     |             |                | Fu et al. 1992 Hum Immunol                                                                                                                                               | D  |                                                                                                                                                                   |

|     |             |              |                                                                                                                                                                          |    |                                                                                                                                                     |
|-----|-------------|--------------|--------------------------------------------------------------------------------------------------------------------------------------------------------------------------|----|-----------------------------------------------------------------------------------------------------------------------------------------------------|
| DRB | 74R         | 70Q 73G 74R  | HLA Epitope Registry website*                                                                                                                                            | A1 | SAB analysis of human mAb BVK3D6 verifies eplet 74R (Figure S3C-D)                                                                                  |
|     |             |              | Berte et al. 1989 Immunobiology of HLA Volume II: Immunogenetics and Histocompatibility                                                                                  | D  | This publication is not peer-reviewed.                                                                                                              |
|     |             |              | Marsh et al. 1989 Immunol Today                                                                                                                                          | D  |                                                                                                                                                     |
|     |             |              | Cai et al. 2006 Clin Transpl                                                                                                                                             | B  | This publication defines this eplet as 74R. This reference is not yet included in the HLA Epitope Registry for this eplet and is not peer-reviewed. |
| DRB | 77N         | 73G 77N 78Y  | Berte et al. 1989 Immunobiology of HLA Volume II: Immunogenetics and Histocompatibility                                                                                  | D  | This publication is not peer-reviewed.                                                                                                              |
|     |             |              | Ballas et al. 1990 Tissue Antigens                                                                                                                                       | D  |                                                                                                                                                     |
|     |             |              | Maurer et al. 1991 J Immunol                                                                                                                                             | D  |                                                                                                                                                     |
|     |             |              | Klohe et al. 1993 Hum Immunol                                                                                                                                            | D  |                                                                                                                                                     |
|     |             |              | Heyes et al. 1992 HLA 1991 - Proceedings of the Eleventh International Histocompatibility Workshop and Conference – Volume 2                                             | D  | This publication is not peer-reviewed.                                                                                                              |
|     |             |              | Cai et al. 2006 Clin Transpl                                                                                                                                             | B  | This publication defines this eplet as 77N. This publication is not peer-reviewed.                                                                  |
| DRB | 77T         | 77T          | Madrigal et al. 1989 J Immunol                                                                                                                                           | D  |                                                                                                                                                     |
|     |             |              | Maurer et al. 1992 HLA 1991 - Proceedings of the Eleventh International Histocompatibility Workshop and Conference – Volume 2                                            | D  | This publication is not peer-reviewed.                                                                                                              |
|     |             |              | Klohe et al. 1993 Hum Immunol                                                                                                                                            | D  |                                                                                                                                                     |
|     |             |              | Cai et al. 2006 Am J Transplant                                                                                                                                          | A2 |                                                                                                                                                     |
|     |             |              |                                                                                                                                                                          |    |                                                                                                                                                     |
| DRB | 96EV        | 96E 98K 180V | Marrari et al. 2009 Hum Immunol                                                                                                                                          | B  |                                                                                                                                                     |
|     |             |              | Loh et al. 1993 Tissue Antigens                                                                                                                                          | D  |                                                                                                                                                     |
|     |             |              | Cai et al. 2006 Am J Transplant                                                                                                                                          | B  | This publication defines this eplet as 96E.                                                                                                         |
| DRB | 96HK        | 96H 98K 120S | HLA Epitope Registry website*                                                                                                                                            | X  | SAB analysis of human mAb RTLK1E2 does not confirm eplet 96HK, but verifies eplet 149H (Figure 4C).                                                 |
|     |             |              | HLA Epitope Registry website                                                                                                                                             | B  | This data is solely published on the HLA Epitope Registry website and is not peer-reviewed.                                                         |
|     |             |              | Navarette et al. 1997 HLA: Genetic diversity of HLA: Functional and Medical Implications Volume 1 - Proceedings of the Twelfth International Histocompatibility Workshop | D  | This publication is not peer-reviewed.                                                                                                              |
|     |             |              | Cai et al. 2006 Clin Transpl                                                                                                                                             | X  | This publication does not provide evidence for the antibody verification of eplet 96HK.                                                             |
| DRB | 96Y         | 96Y          | Maurer et al. 1991 J Immunol                                                                                                                                             | D  |                                                                                                                                                     |
|     |             |              | Drover et al. 1994 Hum Immunol                                                                                                                                           | D  |                                                                                                                                                     |
|     |             |              | Inoko et al. 1992 HLA 1991 - Proceedings of the Eleventh International Histocompatibility Workshop and Conference – Volume 1                                             | D  | This publication is not peer-reviewed.                                                                                                              |
|     |             |              | Cai et al. 2006 Clin Transpl                                                                                                                                             | B  | This publication defines the potential eplets as 13H/33H/96Y/180L. This publication is not peer-reviewed.                                           |
| DRB | 98E         | 98E          | HLA Epitope Registry website                                                                                                                                             | B  | This data is solely published on the HLA Epitope Registry website and is not peer-reviewed.                                                         |
|     |             |              | Cai et al. 2006 Clin Transpl                                                                                                                                             | B  | This publication is not peer-reviewed.                                                                                                              |
| DRB | <u>98ES</u> | 98E 120S     | HLA Epitope Registry website                                                                                                                                             | B  | This data is solely published on the HLA Epitope Registry website and is not peer-reviewed.                                                         |
|     |             |              | Duquesnoy et al. 2016 Hum Immunol                                                                                                                                        | B  |                                                                                                                                                     |

|     |      |              |                                                                                                                                                                                    |    |                                                                                                                                                    |
|-----|------|--------------|------------------------------------------------------------------------------------------------------------------------------------------------------------------------------------|----|----------------------------------------------------------------------------------------------------------------------------------------------------|
|     |      |              | Cai et al. 2006 Clin Transpl                                                                                                                                                       | B  | This publication defines this eplet as 78V. This publication is not peer-reviewed.                                                                 |
|     |      |              | Kramer et al. 2020 Am J Transplant                                                                                                                                                 | A1 | This reference is not yet included in the HLA Epitope Registry for this eplet. This study defined this eplet as 78V or 96H 98E 120S.               |
| DRB | 98Q  | 96H 98Q 120S | Taylor et al. 1989 Immunobiology of HLA Volume I: Histocompatibility Testing                                                                                                       | C  | This publication is not peer-reviewed.                                                                                                             |
|     |      |              | Kolstad et al. 1988 Tissue Antigens                                                                                                                                                | C  |                                                                                                                                                    |
|     |      |              | Cai et al. 2006 Clin Transpl                                                                                                                                                       | D  | This publication defines this eplet as 98Q. This publication is not peer-reviewed.                                                                 |
| DRB | 104A | 104A         | Cai et al. 2006 Clin Transpl                                                                                                                                                       | D  | This publication is not peer-reviewed.                                                                                                             |
|     |      |              | Cai et al. 2006 Am J Transplant                                                                                                                                                    | B  |                                                                                                                                                    |
| DRB | 108T | 108T         | Van den Berg-Loonen et al. 1997 HLA: Genetic diversity of HLA: Functional and Medical Implications Volume 1 - Proceedings of the Twelfth International Histocompatibility Workshop | C  | This publication is not peer-reviewed.                                                                                                             |
|     |      |              | Cai et al. 2006 Clin Transpl                                                                                                                                                       | D  | This publication defines the potential eplets as 9Q/108T. This publication is not peer-reviewed.                                                   |
| DRB | 142M | 142M         | Bodmer et al. 1977 Histocompatibility testing 1977                                                                                                                                 | C  | This publication is not peer-reviewed.                                                                                                             |
|     |      |              | Nelson et al. 1989 Immunobiology of HLA Volume I: Histocompatibility Testing                                                                                                       | D  | This publication is not peer-reviewed.                                                                                                             |
|     |      |              | Navarette et al. 1997 HLA: Genetic diversity of HLA: Functional and Medical Implications Volume 1 - Proceedings of the Twelfth International Histocompatibility Workshop           | D  | This publication is not peer-reviewed.                                                                                                             |
|     |      |              | Cai et al. 2006 Clin Transpl                                                                                                                                                       | B  | This publication defines the potential eplets as 11P/13R/133L/142M. This reference is not yet included in the HLA Epitope Registry for this eplet  |
| DRB | 149H | 149H         | *                                                                                                                                                                                  | A1 | SAB analysis of human mAb RTLK1E2 verifies eplet 149H (Figure 4C). Eplet 149H is not considered antibody-verified yet by the HLA Epitope Registry. |
|     |      |              | Cai et al. 2006 Clin Transpl                                                                                                                                                       | B  | This reference is not yet included in the HLA Epitope Registry for this eplet. This publication is not peer-reviewed.                              |
| DRB | 181M | 181M         | Fu et al. 1992 Hum Immunol                                                                                                                                                         | D  |                                                                                                                                                    |
|     |      |              | Fu et al. 1995 Hum Immunol                                                                                                                                                         | D  |                                                                                                                                                    |
|     |      |              | Cai et al. 2006 Am J Transplant                                                                                                                                                    | B  |                                                                                                                                                    |
|     |      |              | Cai et al. 2006 Clin Transpl                                                                                                                                                       | B  | This reference is not yet included in the HLA Epitope Registry for this eplet. This publication is not peer-reviewed.                              |
| DQB | 45EV | 45E 46V 47Y  | Schreuder et al. 1986 Hum Immunol                                                                                                                                                  | D  |                                                                                                                                                    |
|     |      |              | Kenter et al. 1989 Hum Immunol                                                                                                                                                     | D  |                                                                                                                                                    |
|     |      |              | Maeda et al. 1986 Tissue Antigens                                                                                                                                                  | D  |                                                                                                                                                    |
|     |      |              | Navarette et al. 1997 HLA: Genetic diversity of HLA: Functional and Medical Implications Volume 1 - Proceedings of the Twelfth International Histocompatibility Workshop           | D  | This publication is not peer-reviewed.                                                                                                             |
|     |      |              | Deng et al. 2006 Clin Transpl                                                                                                                                                      | B  | This publication defines this eplet as 45E. This publication is not peer-reviewed.                                                                 |
|     |      |              | El-Awar et al. 2013 Hum Immunol                                                                                                                                                    | A2 | This publication defines this eplet as 45E.                                                                                                        |
|     |      |              | Deng et al. 2008 Transplantation                                                                                                                                                   | B  | This publication defines this eplet as 45E. This reference is not yet included in the HLA Epitope Registry for this eplet.                         |
|     |      |              | Bezstarosti et al. 2022 Front Immunol                                                                                                                                              | A1 | This reference is not yet included in the HLA Epitope Registry for this eplet.                                                                     |
| DQB | 45GV | 45G 46V      | Schreuder et al. 1986 Hum Immunol                                                                                                                                                  | D  |                                                                                                                                                    |
|     |      |              | Radka et al. 1989 Hum Immunol                                                                                                                                                      | D  |                                                                                                                                                    |

|     |             |                     |                                                                                                                                                                          |    |                                                                                                                                                           |
|-----|-------------|---------------------|--------------------------------------------------------------------------------------------------------------------------------------------------------------------------|----|-----------------------------------------------------------------------------------------------------------------------------------------------------------|
|     |             |                     | Kenter et al. 1989 Hum Immunol                                                                                                                                           | D  |                                                                                                                                                           |
|     |             |                     | Nordwig et al. 1991 Hum Immunol                                                                                                                                          | D  |                                                                                                                                                           |
|     |             |                     | Viken et al. 1995 Tissue Antigens                                                                                                                                        | D  |                                                                                                                                                           |
|     |             |                     | Petersen et al. 1992 J Immunol Methods                                                                                                                                   | D  |                                                                                                                                                           |
|     |             |                     | El-Awar et al. 2013 Hum Immunol                                                                                                                                          | A2 |                                                                                                                                                           |
|     |             |                     | Deng et al. 2008 Transplantation                                                                                                                                         | B  | This publication defines this eplet as 45G+46V. This reference is not yet included in the HLA Epitope Registry for this eplet.                            |
| DQB | <u>46VY</u> | 46V 52P 28T         | Marsh et al. 1989 Immunol Today                                                                                                                                          | D  |                                                                                                                                                           |
|     |             |                     | El-Awar et al. 2013 Hum Immunol                                                                                                                                          | A2 | This publication defines this eplet as 52P.                                                                                                               |
|     |             |                     | Deng et al. 2006 Clin Transpl                                                                                                                                            | B  | This publication defines the potential eplets as 28T/46V/52P. This publication is not peer-reviewed.                                                      |
|     |             |                     | Deng et al. 2008 Transplantation                                                                                                                                         | A2 | This publication defines the potential eplets as 28T/46V/52P.                                                                                             |
| DQB | <u>52LL</u> | 52L 55L 28S 30S 37I | Pistillo et al. 1986 Hum Immunol                                                                                                                                         | C  |                                                                                                                                                           |
|     |             |                     | Pistillo et al. 1992 Hum Immunol                                                                                                                                         | X  | The panel of cells used in this study is not sufficient for eplet analysis.                                                                               |
|     |             |                     | Viken et al. 1995b Hum Immunol                                                                                                                                           | D  |                                                                                                                                                           |
|     |             |                     | Viken et al. 1995a Hum Immunol                                                                                                                                           | D  |                                                                                                                                                           |
|     |             |                     | El-Awar et al. 2013 Hum Immunol                                                                                                                                          | A2 | This publication defines this eplet as 52L. This reference is not yet included in the HLA Epitope Registry for this eplet.                                |
|     |             |                     | Deng et al. 2008 Transplantation                                                                                                                                         | B  | This publication defines this eplet as 28S/30S/37I/52L/55L. This reference is not yet included in the HLA Epitope Registry for this eplet.                |
|     |             |                     | Bezstarosti et al. 2022 Front Immunol                                                                                                                                    | A1 | This reference is not yet included in the HLA Epitope Registry for this eplet.                                                                            |
| DQB | <u>52PQ</u> | 53Q 89G 90I         | Hansen et al. 1987 Hum Immunol                                                                                                                                           | C  |                                                                                                                                                           |
|     |             |                     | Koning et al. 1985 Tissue Antigens                                                                                                                                       | D  |                                                                                                                                                           |
|     |             |                     | Marsh et al. 1989 Immunol Today                                                                                                                                          | D  |                                                                                                                                                           |
|     |             |                     | Dessi et al. 1990 Hum Immunol                                                                                                                                            | C  |                                                                                                                                                           |
|     |             |                     | Navarette et al. 1997 HLA: Genetic diversity of HLA: Functional and Medical Implications Volume 1 - Proceedings of the Twelfth International Histocompatibility Workshop | D  | This publication is not peer-reviewed.                                                                                                                    |
|     |             |                     | Nelson et al. 1989 Immunobiology of HLA Volume I: Histocompatibility Testing                                                                                             | D  | This publication is not peer-reviewed.                                                                                                                    |
|     |             |                     | El-Awar et al. 2013 Hum Immunol                                                                                                                                          | A2 | This publication defines this eplet as 84E.                                                                                                               |
|     |             |                     | Deng et al. 2008 Transplantation                                                                                                                                         | B  | This publication defines the potential eplets as 84E/85V/86A/89G/90I/221Q. This reference is not yet included in the HLA Epitope Registry for this eplet. |
| DQB | 55PP        | 55P 56P             | Marsh et al. 1989 Immunol Today                                                                                                                                          | D  |                                                                                                                                                           |
|     |             |                     | Nelson et al. 1989 Immunobiology of HLA Volume I: Histocompatibility Testing                                                                                             | D  | This publication is not peer-reviewed.                                                                                                                    |
|     |             |                     | Navarette et al. 1997 HLA: Genetic diversity of HLA: Functional and Medical Implications Volume 1 - Proceedings of the Twelfth International Histocompatibility Workshop | D  | This publication is not peer-reviewed.                                                                                                                    |
|     |             |                     | Viken et al. 1995c Hum Immunol                                                                                                                                           | X  | This reference does not provide evidence for the antibody verification of eplet 55PP.                                                                     |
|     |             |                     | Deng et al. 2008 Transplantation                                                                                                                                         | B  | This publication defines this eplet as 55P.                                                                                                               |
|     |             |                     | El-Awar et al. 2013 Hum Immunol                                                                                                                                          | A2 | This publication defines this eplet as 55P.                                                                                                               |
|     |             |                     | Bezstarosti et al. 2022 Front Immunol                                                                                                                                    | A1 | This reference is not yet included in the HLA Epitope Registry for this eplet.                                                                            |
| DQB | 55R         | 55R                 | Kolstad et al. 1989b Hum Immunol                                                                                                                                         | C  |                                                                                                                                                           |
|     |             |                     | Marsh et al. 1989 Immunol Today                                                                                                                                          | D  |                                                                                                                                                           |

|     |             |                          |                                                                                                                                                                          |     |                                                                                                                                |
|-----|-------------|--------------------------|--------------------------------------------------------------------------------------------------------------------------------------------------------------------------|-----|--------------------------------------------------------------------------------------------------------------------------------|
|     |             |                          | Nelson et al. 1989 Immunobiology of HLA Volume I: Histocompatibility Testing                                                                                             | C/D | This publication is not peer-reviewed.                                                                                         |
|     |             |                          | Kennedy et al. 1989 Immunobiology of HLA Volume I: Histocompatibility Testing                                                                                            | C/D | This publication is not peer-reviewed.                                                                                         |
|     |             |                          | Vitale et al. 1992 Hum Immunol                                                                                                                                           | D   |                                                                                                                                |
|     |             |                          | Sánchez et al. 1993 Hum Immunol                                                                                                                                          | C   |                                                                                                                                |
|     |             |                          | Navarette et al. 1997 HLA: Genetic diversity of HLA: Functional and Medical Implications Volume 1 - Proceedings of the Twelfth International Histocompatibility Workshop | D   | This publication is not peer-reviewed.                                                                                         |
|     |             |                          | El-Awar et al. 2013 Hum Immunol                                                                                                                                          | A2  |                                                                                                                                |
|     |             |                          | HLA Epitope Registry website                                                                                                                                             | B   | This data is solely published on the HLA Epitope Registry website and is not peer-reviewed.                                    |
|     |             |                          | Deng et al. 2008 Transplantation                                                                                                                                         | B   | This publication defines this eplet as 52P+55R. This reference is not yet included in the HLA Epitope Registry for this eplet. |
|     |             |                          | Bezstarosti et al. 2022 Front Immunol                                                                                                                                    | A1  | This reference is not yet included in the HLA Epitope Registry for this eplet.                                                 |
| DQB | 56L         | 56L 71D                  | Ishikawa et al. 1987 Immunogenetics                                                                                                                                      | D   |                                                                                                                                |
|     |             |                          | Matsuki et al. 1987 Hum Immunol                                                                                                                                          | B   |                                                                                                                                |
|     |             |                          | Marsh et al. 1989 Immunol Today                                                                                                                                          | D   |                                                                                                                                |
|     |             |                          | Kennedy et al. 1989 Immunobiology of HLA Volume I: Histocompatibility Testing                                                                                            | D   | This publication is not peer-reviewed.                                                                                         |
|     |             |                          | Navarette et al. 1997 HLA: Genetic diversity of HLA: Functional and Medical Implications Volume 1 - Proceedings of the Twelfth International Histocompatibility Workshop | D   | This publication is not peer-reviewed.                                                                                         |
|     |             |                          | Deng et al. 2008 Transplantation                                                                                                                                         | B   | This publication defines this eplet as 56L. This reference is not yet included in the HLA Epitope Registry for this eplet.     |
| DQB | 57V         | 57V                      | El-Awar et al. 2013 Hum Immunol                                                                                                                                          | X   | This literature reference does not provide evidence for the antibody verification of eplet 57V.                                |
|     |             |                          | HLA Epitope Registry website                                                                                                                                             | B   | This data is solely published on the HLA Epitope Registry website and is not peer-reviewed.                                    |
| DQB | <u>74S</u>  | 74S 26G                  | Ge et al. 1994 Hum Immunol                                                                                                                                               | A1  |                                                                                                                                |
|     |             |                          | Duquesnoy et al. 2008 Transpl Immunol                                                                                                                                    | B   |                                                                                                                                |
| DQB | 77R         | 75V 77R                  | El-Awar et al. 2013 Hum Immunol                                                                                                                                          | A2  | This publication defines this eplet as 77R.                                                                                    |
| DQB | 77T         | 77T                      | El-Awar et al. 2013 Hum Immunol                                                                                                                                          | A2  |                                                                                                                                |
| DQB | <u>84QL</u> | 84Q 86E 87L 89T 90T 125A | Vitale et al. 1992 Hum Immunol                                                                                                                                           | D   |                                                                                                                                |
|     |             |                          | El-Awar et al. 2013 Hum Immunol                                                                                                                                          | A2  | This publication defines this eplet as 84Q.                                                                                    |
|     |             |                          | Radka et al. 1985 Hum Immunol                                                                                                                                            | D   |                                                                                                                                |
|     |             |                          | Deng et al. 2008 Transplantation                                                                                                                                         | A2  | This publication defines the potential eplets as 84Q/85L/86E/87L/89T/220H/221H.                                                |
|     |             |                          | Bezstarosti et al. 2022 Front Immunol                                                                                                                                    | A1  | This reference is not yet included in the HLA Epitope Registry for this eplet.                                                 |
| DQB | 87F         | 87F                      | HLA Epitope Registry website                                                                                                                                             | B   | This data is solely published on the HLA Epitope Registry website and is not peer-reviewed.                                    |
| DQB | 87Y         | 87Y                      | HLA Epitope Registry website                                                                                                                                             | B   | This data is solely published on the HLA Epitope Registry website and is not peer-reviewed.                                    |
| DQB | <u>116I</u> | 116I 125S                | Marsh et al. 1989 Immunol Today                                                                                                                                          | D   |                                                                                                                                |
|     |             |                          | Deng et al. 2006 Clin Transpl                                                                                                                                            | B   | This publication defines the potential eplets as 70G+71A/116I/125S. This publication is not peer-reviewed.                     |



|     |              |                                     |                                                                                                                                                                          |    |                                                                                                                                                                                                                  |
|-----|--------------|-------------------------------------|--------------------------------------------------------------------------------------------------------------------------------------------------------------------------|----|------------------------------------------------------------------------------------------------------------------------------------------------------------------------------------------------------------------|
|     |              |                                     | El-Awar et al. 2013 Hum Immunol                                                                                                                                          | A2 | This publication defines this eplet as 125S.                                                                                                                                                                     |
|     |              |                                     | Deng et al. 2008 Transplantation                                                                                                                                         | B  | This publication defines the potential eplets as 70G+71A/116I/125S. This reference is not yet included in the HLA Epitope Registry for this eplet.                                                               |
| DQB | 125SQ        | 125S 126Q                           | El-Awar et al. 2013 Hum Immunol                                                                                                                                          | A2 |                                                                                                                                                                                                                  |
|     |              |                                     | El-Awar et al. 2017 J Immunol Res                                                                                                                                        | X  | This literature reference does not provide any evidence for antibody verification of eplet 125SQ.                                                                                                                |
| DQB | <u>182N</u>  | 182N                                | Navarette et al. 1997 HLA: Genetic diversity of HLA: Functional and Medical Implications Volume 1 - Proceedings of the Twelfth International Histocompatibility Workshop | D  | This publication is not peer-reviewed.                                                                                                                                                                           |
|     |              |                                     | El-Awar et al. 2013 Hum Immunol                                                                                                                                          | A2 |                                                                                                                                                                                                                  |
|     |              |                                     | Deng et al. 2008 Transplantation                                                                                                                                         | B  | This publication defines the potential eplets as 77T+84Q/ 77T+85L/ 77T+ 86E/77T+ 87L/ 182N.                                                                                                                      |
|     |              |                                     | Bezstarosti et al. 2022 Front Immunol                                                                                                                                    | A1 | This reference is not yet included in the HLA Epitope Registry for this eplet.                                                                                                                                   |
| DQB | <u>182S</u>  | 182S                                | El-Awar et al. 2013 Hum Immunol                                                                                                                                          | A2 | This publication defines this eplet as 140A.                                                                                                                                                                     |
| DQA | 2D           | 2D 199A                             | Youngs et al. 2018 Transpl Immunol                                                                                                                                       | B  |                                                                                                                                                                                                                  |
| DQA | 40E          | 40E                                 | HLA Epitope Registry website                                                                                                                                             | B  | This data is solely published on the HLA Epitope Registry website and is not peer-reviewed.                                                                                                                      |
| DQA | <u>40GR</u>  | 40G 47C 50V 51L                     | El-Awar et al. 2013 Hum Immunol                                                                                                                                          | A2 | This publication defines this eplet as 40G.                                                                                                                                                                      |
|     |              |                                     | Deng et al. 2008 Transplantation                                                                                                                                         | A2 | This publication defines the potential eplets as 40G/47C.                                                                                                                                                        |
|     |              |                                     | Tambur et al. 2010 Transplantation                                                                                                                                       | B  |                                                                                                                                                                                                                  |
|     |              |                                     | Duquesnoy et al. 2008 Transpl Immunol                                                                                                                                    | B  |                                                                                                                                                                                                                  |
| DQA | <u>47KHL</u> | 47K 52H 54L                         | El-Awar et al. 2013 Hum Immunol                                                                                                                                          | A2 | This publication defines this eplet as 52H.                                                                                                                                                                      |
|     |              |                                     | Deng et al. 2008 Transplantation                                                                                                                                         | B  | This publication defines the potential eplets as 47K/52H/54L.                                                                                                                                                    |
|     |              |                                     | Duquesnoy et al. 2008 Transpl Immunol                                                                                                                                    | B  |                                                                                                                                                                                                                  |
| DQA | 52SK         | 52S 53K 11C 18F 45A 64R 66M 69A 80Y | Chersi et al. 1989 Z Naturforsch C J Biosci                                                                                                                              | D  |                                                                                                                                                                                                                  |
|     |              |                                     | HLA Epitope Registry website                                                                                                                                             | B  | This data is solely published on the HLA Epitope Registry website and is not peer-reviewed.                                                                                                                      |
| DQA | 61FT         | 61F 64T 55R                         | HLA Epitope Registry website                                                                                                                                             | B  | This data is solely published on the HLA Epitope Registry website and is not peer-reviewed.                                                                                                                      |
| DQA | 75S          | 75S 156L 163E 175K                  | Kolstad et al. 1989b Hum Immunol                                                                                                                                         | C  |                                                                                                                                                                                                                  |
|     |              |                                     | Tambur et al. 2010 Transplantation                                                                                                                                       | B  |                                                                                                                                                                                                                  |
| DQA | 76V          | 76V 26S 47Q 187T                    | HLA Epitope Registry website                                                                                                                                             | B  | This data is solely published on the HLA Epitope Registry website and is not peer-reviewed.                                                                                                                      |
|     |              |                                     | Deng et al. 2008 Transplantation                                                                                                                                         | B  | This publication defines the potential eplet as 26S/47Q/ 56R/187T. This reference is not yet included in the HLA Epitope Registry for this eplet                                                                 |
| DPB | 35FV         | 35F 36V                             | Marshall et al. 1992 HLA 1991 - Proceedings of the Eleventh International Histocompatibility Workshop and Conference – Volume 2                                          | D  | This publication is not peer-reviewed.                                                                                                                                                                           |
|     |              |                                     | Marshall et al. 1998 Hum Immunol                                                                                                                                         | D  |                                                                                                                                                                                                                  |
|     |              |                                     | Youngs 2004 ASHI Quarterly                                                                                                                                               | B  | This publication is not peer-reviewed.                                                                                                                                                                           |
|     |              |                                     | Billen et al. 2010 Tissue Antigens                                                                                                                                       | B  |                                                                                                                                                                                                                  |
| DPB | 56A          | 56A                                 | HLA Epitope Registry website                                                                                                                                             | B  | This data is solely published on the HLA Epitope Registry website and is not peer-reviewed.                                                                                                                      |
|     |              |                                     | Cano et al. 2009 Hum Immunol                                                                                                                                             | B  |                                                                                                                                                                                                                  |
| DPB | 56E          | 55D 56E                             | HLA Epitope Registry website*                                                                                                                                            | X  | SAB analysis of human mAb VR1H5 verifies HLA-DR eplet 58E and is cross-reactive with HLA-DP eplet 56E. mAb VR1H5 does not provide evidence for HLA-DP eplet 56E as inducer of the antibody response (Figure 4A). |

|     |        |                 |                                                                                                                                                                         |    |                                                                                             |
|-----|--------|-----------------|-------------------------------------------------------------------------------------------------------------------------------------------------------------------------|----|---------------------------------------------------------------------------------------------|
|     |        |                 | *                                                                                                                                                                       | A1 | SAB analysis of human mAb RTLK10E12 verifies eplet 56E (Figure 4B).                         |
|     |        |                 | Mazzoleni et al. 1989 Immunogenetics                                                                                                                                    | C  |                                                                                             |
|     |        |                 | Pistillo et al. 1992 HLA 1991 - Proceedings of the Eleventh International Histocompatibility Workshop and Conference – Volume 2                                         | A1 | This publication is not peer-reviewed.                                                      |
|     |        |                 | Marshall et al. 1998 Hum Immunol                                                                                                                                        | D  |                                                                                             |
|     |        |                 | Cano et al. 2009 Hum Immunol                                                                                                                                            | B  | This reference is not yet included in the HLA Epitope Registry for this eplet.              |
| DPB | 56EE   | 55D 56E 57E     | Deng et al. 2007 Clin Transpl                                                                                                                                           | B  | This publication is not peer-reviewed.                                                      |
| DPB | 57D    | 55D 56E 57D     | Marshall et al. 1998 Hum Immunol                                                                                                                                        | D  |                                                                                             |
|     |        |                 | Tongio et al. 1997 HLA: Genetic diversity of HLA: Functional and Medical Implications Volume 2 - Proceedings of the Twelfth International Histocompatibility Conference | D  | This publication is not peer-reviewed.                                                      |
|     |        |                 | Deng et al. 2007 Clin Transpl                                                                                                                                           | B  | This publication is not peer-reviewed.                                                      |
|     |        |                 | Billen et al. 2010 Tissue Antigens                                                                                                                                      | B  |                                                                                             |
|     |        |                 | HLA Epitope Registry website                                                                                                                                            | B  | This data is solely published on the HLA Epitope Registry website and is not peer-reviewed. |
| DPB | 69E    | 69E             | Arroyo et al. 1995 Hum Immunol                                                                                                                                          | D  |                                                                                             |
| DPB | 84DEAV | 84D 85E 86A 87V | HLA Epitope Registry website*                                                                                                                                           | A1 | SAB analysis of human mAb TL3B6 verifies eplet 84DEAV (Figure S3A-B).                       |
|     |        |                 | Deng et al. 2007 Clin Transpl                                                                                                                                           | A2 | This publication is not peer-reviewed.                                                      |
|     |        |                 | Kolstad et al. 1989a Hum Immunol                                                                                                                                        | C  |                                                                                             |
|     |        |                 | Marshall et al. 1998 Hum Immunol                                                                                                                                        | D  |                                                                                             |
|     |        |                 | Tongio et al. 1997 HLA: Genetic diversity of HLA: Functional and Medical Implications Volume 2 - Proceedings of the Twelfth International Histocompatibility Conference | D  | This publication is not peer-reviewed.                                                      |
|     |        |                 | Youngs 2004 ASHI Quarterly                                                                                                                                              | B  | This publication is not peer-reviewed.                                                      |
|     |        |                 | Duquesnoy et al. 2008 Transpl Immunol                                                                                                                                   | B  |                                                                                             |
|     |        |                 | Billen et al. 2010 Tissue Antigens                                                                                                                                      | B  |                                                                                             |
|     |        |                 | Cano et al. 2009 Hum Immunol                                                                                                                                            | B  |                                                                                             |
| DPB | 85GPM  | 85G 86P 87M     | Viken et al. 1989 Tissue Antigens                                                                                                                                       | D  |                                                                                             |
|     |        |                 | Marshall et al. 1998 Hum Immunol                                                                                                                                        | D  |                                                                                             |
|     |        |                 | Inoko et al. 1992 HLA 1991 - Proceedings of the Eleventh International Histocompatibility Workshop and Conference – Volume 1                                            | D  | This publication is not peer-reviewed.                                                      |
|     |        |                 | Tongio et al. 1997 HLA: Genetic diversity of HLA: Functional and Medical Implications Volume 2 - Proceedings of the Twelfth International Histocompatibility Conference | D  | This publication is not peer-reviewed.                                                      |
|     |        |                 | Youngs 2004 ASHI Quarterly                                                                                                                                              | B  | This publication is not peer-reviewed.                                                      |
|     |        |                 | Billen et al. 2010 Tissue Antigens                                                                                                                                      | B  |                                                                                             |
|     |        |                 | Cano et al. 2009 Hum Immunol                                                                                                                                            | B  |                                                                                             |
|     |        |                 | HLA Epitope Registry website                                                                                                                                            | B  | This data is solely published on the HLA Epitope Registry website and is not peer-reviewed. |
|     |        |                 | Kramer et al. Manuscript in preparation                                                                                                                                 | A1 |                                                                                             |

|     |     |          |                                             |   |                                                                                                                                                                  |
|-----|-----|----------|---------------------------------------------|---|------------------------------------------------------------------------------------------------------------------------------------------------------------------|
|     |     |          | Deng et al. 2007 Clin Transpl               | B | This publication defines this eplet as 85G+86G+86P +87M. This reference is not yet included in the HLA Epitope Registry for this eplet and is not peer-reviewed. |
| DPB | 96K | 96K 170I | HLA Epitope Registry website                | B | This data is solely published on the HLA Epitope Registry website and is not peer-reviewed.                                                                      |
| DPA | 50Q | 50Q      | Duquesnoy et al. 2008 Transpl Immunol       | B |                                                                                                                                                                  |
|     |     |          | HLA Epitope Registry website                | B | This data is solely published on the HLA Epitope Registry website and is not peer-reviewed.                                                                      |
| DPA | 50R | 50R      | Marshall et al. 1998 Hum Immunol            | D |                                                                                                                                                                  |
|     |     |          | Heyes et al. 1986 Proc Natl Acad Sci U S A  | D |                                                                                                                                                                  |
|     |     |          | Young et al. 1988 Hum Immunol               | D |                                                                                                                                                                  |
|     |     |          | HLA Epitope Registry website                | B | This data is solely published on the HLA Epitope Registry website and is not peer-reviewed.                                                                      |
|     |     |          | Thammanichanond et al. 2018 Transplant Proc | B |                                                                                                                                                                  |

<sup>1</sup>A1, Human monoclonal antibody + single antigen bead (SAB) assay and/or complement dependent cytotoxicity assay (CDC) with high resolution HLA typed cells; A2, Adsorption and elution studies + SAB and/or CDC with high resolution HLA typed cells; B, Patient serum tested in SAB; C, Human monoclonal antibody or adsorption and elution studies or patient sera tested with serologically typed cells; D, Other species (e.g. murine monoclonal antibody).

\*Single antigen bead analysis of this human mAb is provided in this paper.

**Bold:** Eplets that currently not antibody-verified in the HLA Epitope Registry.

Underlined: The residues of these eplets exceed the 3.5 Ångstrom radius and we therefore propose to consider these eplets as antibody-verified reactivity patterns. See Table 7 for proposed definitions and rationale.

**Supplementary Table 4.** Residue differences in reactivity patterns on Common HLA alleles

| Reactivity pattern                                           | Allele*    | Residues                                                            | Common in population                |
|--------------------------------------------------------------|------------|---------------------------------------------------------------------|-------------------------------------|
| 44K / 150V / 158V                                            | A*01:06    | 44K / 150V / <u>158A</u>                                            | MENA                                |
|                                                              | A*24:22    | <u>44R</u> / <u>150A</u> / 158V                                     | HIS, NAM                            |
| 74S / 26G                                                    | DQB1*03:05 | <u>74E</u> / 26G                                                    | AFA, API, EURO, MENA, HIS, NAM, UNK |
|                                                              | DQB1*03:25 | <u>74E</u> / 26G                                                    | NAM                                 |
| 53L / 84Q / 85L / 86E / 87L / 89T / 90T / 125A / 220H / 221H | DQB1*03:09 | 53L / 84Q / 85L / 86E / 87L / 89T / 90T / 125A / 220H / <u>221R</u> | AFA, NAM                            |
| 52P + 53L / 140T / 182N                                      | DQB1*03:09 | 52P + 53L / 140T / <u>182P</u>                                      | AFA, NAM                            |

\*Common alleles in the CIWD database (version 3.0.0) (Hurley et al. HLA. 2020 Jun;95(6):516-531. doi: 10.1111/tan.13811.)

AFA; African/African American, API; Asian/Pacific Islands, EURO; European/European descent, MENA; Middle East/North coast of Africa, HIS; South or Central America/Hispanic/Latino, NAM; Native American populations, UNK; Unknown/Not asked/Multiple ancestries/Other.

## References

*HLA Epitope Registry website.*

Adeyi, OA, AL Girnita, J Howe, M Marrari, Y Awadalla, M Askar, et al. Serum analysis after transplant nephrectomy reveals restricted antibody specificity patterns against structurally defined HLA class I mismatches. *Transpl Immunol* (2005) 14(1): 53-62.

Akaza, T, N El-Awar, A Nguyen, J Kitawaki and P Terasaki. HLA class I epitopes: C-locus. *Clin Transpl* (2006): 95-102.

Arroyo, J, AM Alvarez, C Nombela and M Sánchez-Pérez. The role of HLA-DP beta residue 69 in the definition of antibody-binding epitopes. *Hum Immunol* (1995) 43(3): 219-226.

Bachelet, T, L Couzi, G Guidicelli, K Moreau, D Morel, P Merville, et al. Anti-Cw donor-specific alloantibodies can lead to positive flow cytometry crossmatch and irreversible acute antibody-mediated rejection. *Am J Transplant* (2011) 11(7): 1543-1544.

Ballas, M, TH Eiermann, A Wolpl and SF Goldmann. Mapping of an HLA-DRw52-associated determinant on DR beta 1 molecules. *Tissue Antigens* (1990) 36(5): 187-193.

Berte, CC, J Gorski, W Reith and B Mach. Epitope Mapping of HLA-DR Antigens with the Use of DNA-Transfected Cells. In: B Dupont, editor. *Immunobiology of HLA Volume II: Immunogenetics and Histocompatibility*. New York: Springer-Verlag (1989). p. 245-247.

Bezstarosti, S, CSM Kramer, MEI Franke-van Dijk, M Vergunst, KH Bakker, M Uyar-Mercankaya, et al. HLA-DQ-Specific Recombinant Human Monoclonal Antibodies Allow for In-Depth Analysis of HLA-DQ Epitopes. *Front Immunol* (2022) 12: 761893.

Billen, EV, MH Christiaans, Doxiadis, II, CE Voorter and EM van den Berg-Loonen. HLA-DP antibodies before and after renal transplantation. *Tissue Antigens* (2010) 75(3): 278-285.

Bodmer, JG, P Pickbourne and S Richards. Joint Report: I a Serology In: WF Bodmer, JR Batchelor, JG Bodmer, H Festenstein and PJ Morris, editors. *Histocompatibility testing 1977*. Copenhagen: Munksgaard (1977). p. 35-84.

Bunce, M, PM Sutton, A Ting and PJ Morris. The production of a human monoclonal antibody defining a split of HLA-DRw13 (DRw13b). *Tissue Antigens* (1990) 36(3): 100-102.

Cai, J, S Kohanof and PI Terasaki. HLA-DR antibody epitopes. *Clin Transpl* (2006): 103-114.

Cai, J, PI Terasaki, Q Mao, T Pham, N El-Awar, JH Lee, et al. Development of nondonor-specific HLA-DR antibodies in allograft recipients is associated with shared epitopes with mismatched donor DR antigens. *Am J Transplant* (2006) 6(12): 2947-2954.

Cano, P and M Fernández-Viña. Two sequence dimorphisms of DPB1 define the immunodominant serologic epitopes of HLA-DP. *Hum Immunol* (2009) 70(10): 836-843.

- Cauquil, B, G Dautin and RJ Duquesnoy. Case report: A transplant candidate with unexpected serum reactivity against the 45KE eplet on HLA-B alleles. *Hla* (2018) 92(4): 231-232.
- Cayrol, C, F Moro, E Sommer, J Tkaczuk, E Ohayon and A Cambon-Thomsen. New polymorphic HLA-DR epitopes recognized by three monoclonal antibodies produced against DR103 transfected L cells. *Tissue Antigens* (1992) 40(4): 197-203.
- Cayrol, C, J Tkaczuk, E Sommer and A Cambon-Thomsen. A subset of HLA-DR9 molecules is detected by a polymorphic monoclonal antibody on lymphoblastoid cell lines but not on peripheral blood lymphocytes. *Hum Immunol* (1995) 44(1): 19-27.
- Chersi, A, TF Romano and F Chillemi. Preparation and isolation of antibodies to human MHC class II alpha chains by aid of synthetic peptides. *Z Naturforsch C J Biosci* (1989) 44(9-10): 813-818.
- De Vito, LD, BP Mason, E Jankowska-Gan, KT Hogan, JW Guo, CT Lutz, et al. Epitope fine specificity of human anti-HLA-A2 antibodies. Identification of four epitopes including a haptenlike epitope on HLA-A2 at lysine 127. *Hum Immunol* (1993) 37(3): 165-177.
- Deng, CT, J Cai, M Ozawa and N El-Awar. HLA class II DP epitopes. *Clin Transpl* (2007): 195-202.
- Deng, CT, J Cai, C Tarsitani, N El-Awar, N Lachmann and M Ozawa. HLA class II DQ epitopes. *Clin Transpl* (2006): 115-122.
- Deng, CT, N El-Awar, M Ozawa, J Cai, N Lachmann and PI Terasaki. Human leukocyte antigen class II DQ alpha and beta epitopes identified from sera of kidney allograft recipients. *Transplantation* (2008) 86(3): 452-459.
- Dessi, V, B Sanchez, M Garzon, R Magarino, MD Maldonado and A Nunez-Roldan. Characterization of three human monoclonal antibodies specific for polymorphic class I and class II HLA antigens. *Hum Immunol* (1990) 27(4): 323-332.
- Drover, S, RW Karr, XT Fu and WH Marshall. Analysis of monoclonal antibodies specific for unique and shared determinants on HLA-DR4 molecules. *Hum Immunol* (1994) 40(1): 51-60.
- Drover, S, WH Marshall and R Karr. Contribution of residues 70 and 73 of HLA-DRB1 chains to the binding of monoclonal antibody NFLD.D10. In: K Tsuji, M Aizawa and T Sasazuki, editors. *HLA 1991 - Proceedings of the Eleventh International Histocompatibility Workshop and Conference – Volume 2*. Oxford: Oxford University Press (1992). p. 408-410.
- Drover, S, WH Marshall, WW Kwok, GT Nepom and RW Karr. Amino acids in the peptide-binding groove influence an antibody-defined, disease-associated HLA-DR epitope. *Scand J Immunol* (1994) 39(6): 539-550.
- Duquesnoy, RJ, Y Awadalla, J Lomago, L Jelinek, J Howe, D Zern, et al. Retransplant candidates have donor-specific antibodies that react with structurally defined HLA-DR,DQ,DP epitopes. *Transpl Immunol* (2008) 18(4): 352-360.

- Duquesnoy, RJ, G Honger, I Hosli, M Marrari and S Schaub. Detection of newly antibody-defined epitopes on HLA class I alleles reacting with antibodies induced during pregnancy. *Int J Immunogenet* (2016) 43(4): 200-208.
- Duquesnoy, RJ, G Honger, I Hosli, M Marrari and S Schaub. Identification of epitopes on HLA-DRB alleles reacting with antibodies in sera from women sensitized during pregnancy. *Hum Immunol* (2016) 77(2): 214-222.
- Duquesnoy, RJ and M Marrari. Detection of antibodies against HLA-C epitopes in patients with rejected kidney transplants. *Transpl Immunol* (2011) 24(3): 164-171.
- Duquesnoy, RJ, M Marrari, L Jelenik, A Zeevi, FH Claas and A Mulder. Structural aspects of HLA class I epitopes reacting with human monoclonal antibodies in Ig-binding, C1q-binding and lymphocytotoxicity assays. *Hum Immunol* (2013) 74(10): 1271-1279.
- Duquesnoy, RJ, M Marrari, A Mulder, FH Claas, J Mostecky and I Balazs. Structural aspects of human leukocyte antigen class I epitopes detected by human monoclonal antibodies. *Hum Immunol* (2012) 73(3): 267-277.
- El-Awar, N, V Jucaud and A Nguyen. HLA Epitopes: The Targets of Monoclonal and Alloantibodies Defined. *J Immunol Res* (2017) 2017: 3406230.
- El-Awar, N, JH Lee, C Tarsitani and PI Terasaki. HLA class I epitopes: recognition of binding sites by mAbs or eluted alloantibody confirmed with single recombinant antigens. *Hum Immunol* (2007) 68(3): 170-180.
- El-Awar, N, A Nguyen, K Almeshari, M Alawami, F Alzayer, M Alharbi, et al. HLA class II DQA and DQB epitopes: recognition of the likely binding sites of HLA-DQ alloantibodies eluted from recombinant HLA-DQ single antigen cell lines. *Hum Immunol* (2013) 74(9): 1141-1152.
- El-Awar, N, PI Terasaki, J Cai, CT Deng, M Ozawa, A Nguyen, et al. Epitopes of HLA-A, B, C, DR, DQ, DP and MICA antigens. *Clin Transpl* (2009): 295-321.
- El-Awar, N, PI Terasaki, A Nguyen, M Lias and N Conger. New HLA class I epitopes defined by murine monoclonal antibodies. *Hum Immunol* (2010) 71(5): 456-461.
- El-Awar, NR, T Akaza, PI Terasaki and A Nguyen. Human leukocyte antigen class I epitopes: update to 103 total epitopes, including the C locus. *Transplantation* (2007) 84(4): 532-540.
- Fernandez-Vina, M, M Maiers, M Gutierrez, A Mulder, JH Lee, J Stoddard, et al. 13th IHWS Serology and HLA Phenotypes Joint Report. In: JA Hansen, editor. *Immunobiology of the Human MHC - Proceedings of the 13th International Histocompatibility Workshop and Conference - Volume I*. Seattle IHWG Press (2006). p. 890-931.
- Fu, XT, S Drover, WH Marshall and RW Karr. HLA-DR residues accessible under the peptide-binding groove contribute to polymorphic antibody epitopes. *Hum Immunol* (1995) 43(4): 243-250.

Fu, XT and RW Karr. HLA-DR alpha chain residues located on the outer loops are involved in nonpolymorphic and polymorphic antibody-binding epitopes. *Hum Immunol* (1994) 39(4): 253-260.

Fu, XT, WY Yu, C Alber, C Benson, R Watts, H Nordwig, et al. Identification of residues involved in polymorphic antibody binding epitopes on HLA-DR molecules. *Hum Immunol* (1992) 33(1): 47-56.

Fuggle, SV, C Carter and PJ Morris. Monoclonal antibody definition of the DRB3 allele, HLA-Dw25. *Tissue Antigens* (1989) 34(3): 149-157.

Ge, J, A Bratlie and K Hannestad. A human hybridoma monoclonal antibody (TrJ11) recognizing a new HLA-DR epitope shared by DR4, DR8, DR11, and DRB1\*1303. *Hum Immunol* (1995) 42(1): 27-34.

Ge, J and K Hannestad. A cytotoxic human hybridoma monoclonal antibody (TrJ5) specific for HLA-B38(16) and -B39(16). *Hum Immunol* (1993) 36(3): 168-171.

Ge, J and K Hannestad. A cytotoxic human hybridoma monoclonal antibody (TrJ6) defining an epitope expressed by HLA-DQ4 and -DQ5. *Hum Immunol* (1994) 39(2): 106-112.

Hancock, RJ, A Martin, GJ Laundy, J Smythe, I Roberts, H Cooke, et al. Production of monoclonal human antibody to HLA-DR5 (DRw11) by mouse/human heterohybridomas. *Hum Immunol* (1988) 22(2): 135-142.

Hansen, T, A Kolstad, G Mathisen and K Hannestad. A human-human hybridoma (Tr7E2) producing cytotoxic antibody to HLA-DQw1. *Hum Immunol* (1987) 20(4): 307-320.

Heyes, J, P Austin, J Bodmer, W Bodmer, A Madrigal, MC Mazzilli, et al. Monoclonal antibodies to HLA-DP-transfected mouse L cells. *Proc Natl Acad Sci U S A* (1986) 83(10): 3417-3421.

Heyes, JM, H Inoko, J Trowsdale, A Sadler, SG Marsh and J Bodmer. Fine mapping of Eleventh International Histocompatibility Workshop HLA class II monoclonal antibodies using transfectants. In: K Tsuji, M Aizawa and T Sasazuki, editors. *HLA 1991 - Proceedings of the Eleventh International Histocompatibility Workshop and Conference – Volume 2*. Oxford: Oxford University Press (1992). p. 400-404.

Hogan, KT, C Clayberger, EJ Bernhard, SF Walk, JP Ridge, P Parham, et al. Identification by site-directed mutagenesis of amino acid residues contributing to serologic and CTL-defined epitope differences between HLA-A2.1 and HLA-A2.3. *J Immunol* (1988) 141(7): 2519-2525.

Inoko, H, JG Bodmer, JM Heyes, S Drover, J Trowsdale and WH Marshall. Joint report on the transfectant/monoclonal antibody component. In: K Tsuji, M Aizawa and T Sasazuki, editors. *HLA 1991 - Proceedings of the Eleventh International Histocompatibility Workshop and Conference – Volume 1*. Oxford: Oxford University Press (1992). p. 919-930.

Ishikawa, N, H Kojima, T Nakayama, H Kunikane, S Hawkin, Y Fukasawa, et al. Detection of a novel HLA-DQ specificity: serological and immunochemical analyses by a monoclonal antibody. *Immunogenetics* (1987) 26(3): 143-149.



Kennedy, LJ, SGE Marsh and J Bodmer. Cytotoxic Monoclonal Antibodies In: B Dupont, editor. *Immunobiology of HLA Volume I: Histocompatibility Testing*. New York: Springer-Verlag (1989). p. 301-305.

Kenter, MJ, JD Anholts, GM Schreuder, MC van Eggermond, GM Ghyselen, JJ van Rood, et al. Unambiguous typing for HLA-DQ TA10 and 2B3 specificities using specific oligonucleotide probes. *Hum Immunol* (1989) 24(1): 65-73.

Klohe, E, XT Fu, M Ballas and RW Karr. HLA-DR beta chain residues that are predicted to be located in the floor of the peptide-binding groove contribute to antibody-binding epitopes. *Hum Immunol* (1993) 37(1): 51-58.

Klohe, E, MP Pistillo, GB Ferrara, NE Goeken, NS Greazel and RW Karr. Critical role of HLA-DR beta 1 residue 58 in multiple polymorphic epitopes recognized by xenogeneic and allogeneic antibodies. *Hum Immunol* (1992) 35(1): 18-28.

Knowles, RW. Structural Polymorphism of the HLA Class II  $\alpha$  and  $\beta$  Chains: Summary of the 10th Workshop 2-D Gel Analysis. In: B Dupont, editor. *Immunobiology of HLA Volume I: Histocompatibility Testing*. New York: Springer-Verlag (1989). p. 365-380.

Knowles, RW, N Flomenberg, K Horibe, R Winchester, SF Radka and B Dupont. Complexity of the supertypic HLA-DRw53 specificity: two distinct epitopes differentially expressed on one or all of the DR beta-chains depending on the HLA-DR allotype. *J Immunol* (1986) 137(8): 2618-2626.

Kolstad, A and K Hannestad. A supertypic HLA-DP specificity defined by two human-human hybridoma antibodies (TrB50; TrE11). *Hum Immunol* (1989a) 25(4): 247-256.

Kolstad, A, T Hansen and K Hannestad. A cytotoxic human-human hybridoma antibody (TrH6) specific for HLA-DRw52. *Tissue Antigens* (1988) 31(2): 90-97.

Kolstad, A, B Johansen and K Hannestad. Two HLA-DQ-specific human-human hybridoma antibodies (TrG6;TrC5) define epitopes also expressed by a transcomplementing hybrid DQ molecule (DQw7  $\alpha$ /DQw4  $\beta$ ). *Hum Immunol* (1989b) 24(1): 15-29.

Koning, F, J Raghoobar, GM Schreuder, R Schuurman and H Bruning. A monoclonal antibody detecting an HLA-DQw1-related determinant. *Tissue Antigens* (1985) 26(2): 100-109.

Kosinski, S, U Hammerling and SY Yang. A human monoclonal antibody to an HLA-DRw53 (MT3)-like epitope on class II antigens. *Tissue Antigens* (1986) 28(3): 150-162.

Kramer, CSM, MEI Franke-van Dijk, KH Bakker, M Uyar-Mercankaya, GE Karahan, DL Roelen, et al. Generation and reactivity analysis of human recombinant monoclonal antibodies directed against epitopes on HLA-DR. *Am J Transplant* (2020)

Lardy, NM, AR van der Horst, EM van den Berg-Loonen, RE Bontrop and LP de Waal. Fine specificity of the alloantiserum MSD-51: epitope mapping of HLA-DRw53 determinants. *Hum Immunol* (1991) 32(1): 65-71.

- Laundy, GJ, BA Bradley, BM Rees, M Younie and JM Hows. Incidence and specificity of HLA antibodies in multitransfused patients with acquired aplastic anemia. *Transfusion* (2004) 44(6): 814-825.
- Layet, C, B Kahn-Perles, P Pontarotti, P Ferrier, J Sire and FA Lemonnier. Creation of an HLA-A2/HLA-Aw69 alloantigenic determinant on an HLA-A3 molecule by site-directed mutagenesis. *J Immunol* (1987) 138(7): 2197-2201.
- Löffler, D, M Welschof, SF Goldmann and A Wölpl. Recognition of HLA-DR1/DRB1\*0101 molecules presenting HLA-A2 derived peptides by a human recombinant antibody, Fab-5 A1. *Eur J Immunogenet* (1998) 25(5): 339-347.
- Loh, MT, SH Chan and EC Ren. A monoclonal antibody with specificity to the HLA-DR1 and -DR51 antigens. *Tissue Antigens* (1993) 42(2): 100-104.
- Lomago, J, L Jelenik, D Zern, J Howe, J Martell, A Zeevi, et al. How did a patient who types for HLA-B\*4403 develop antibodies that react with HLA-B\*4402? *Hum Immunol* (2010) 71(2): 176-178.
- Lutz, CT, KD Smith, NS Greazel, BE Mace, DA Jensen, JA McCutcheon, et al. Bw4-reactive and Bw6-reactive antibodies recognize multiple distinct HLA structures that partially overlap in the alpha-1 helix. *J Immunol* (1994) 153(9): 4099-4110.
- Madrigal, JA, H Ikeda, SG Marsh, JM Heyes, LJ Kennedy, J Trowsdale, et al. Epitope mapping of an HLA-DR-specific monoclonal antibody produced by using human-mouse transfectant cells. *J Immunol* (1989) 143(12): 4084-4089.
- Maeda, H, R Hirata, H Kambayashi, F Koning and GM Schreuder. Multiple epitopes on a single DQ molecule from the DQw3-carrying haplotypes. *Tissue Antigens* (1986) 28(3): 136-145.
- Marrari, M and RJ Duquesnoy. Why can sensitization by an HLA-DR2 mismatch lead to antibodies that react also with HLA-DR1? *Hum Immunol* (2009) 70(6): 403-409.
- Marsh, SG and JG Bodmer. HLA-DR and -DQ epitopes and monoclonal antibody specificity. *Immunol Today* (1989) 10(9): 305-312.
- Marsh, SGE, JH Moses and JG Bodmer. HLA class II sequence polymorphism detectable by serology. In: K Tsuji, M Aizawa and T Sasazuki, editors. *HLA 1991 - Proceedings of the Eleventh International Histocompatibility Workshop and Conference – Volume 1*. Oxford: Oxford University Press (1992). p. 610-619.
- Marshall, WH, S Drover, D Codner, J Gamberg, MD Copp, HW Liu, et al. HLA-DP epitope typing using monoclonal antibodies. *Hum Immunol* (1998) 59(3): 189-197.
- Marshall, WH, S Drover, H Mervart, HB Younghusband and H Liu. Production of a series of monoclonal antibodies to polymorphisms of HLA-DP. In: K Tsuji, M Aizawa and T Sasazuki, editors. *HLA 1991 - Proceedings of the Eleventh International Histocompatibility Workshop and Conference – Volume 2*. Oxford: Oxford University Press (1992). p. 415-417.

Matsuki, K, T Juji and M Satake. A novel HLA class II alloantigen detected by an alloantiserum TK2. *Hum Immunol* (1987) 18(3): 247-256.

Maurer, D and J Gorski. Transfer of polymorphic monoclonal antibody epitopes to the first and second domains of HLA-DR beta-chains by site-directed mutagenesis. *J Immunol* (1991) 146(2): 621-626.

Maurer, D, JA Madrigal and J Gorski. Thr77 controls a public antibody epitope on HLA-DRB1. In: K Tsuji, M Aizawa and T Sasazuki, editors. *HLA 1991 - Proceedings of the Eleventh International Histocompatibility Workshop and Conference – Volume 2*. Oxford: Oxford University Press (1992). p. 404-406.

Mazzoleni, O, A Longo, G Angelini, M Colonna, N Tanigaki, L Delfino, et al. Human monoclonal antibody MP8 detects a supertypic determinant encoded by DPB alleles DPB2.1, DPB3, DPB4.2, DPB8, DPB9, DPB10, and DPB14. *Immunogenetics* (1989) 30(6): 502-505.

Mulder, A, C Eijssink, MG Kester, ME Franke, MJ Kardol, MH Heemskerk, et al. Impact of peptides on the recognition of HLA class I molecules by human HLA antibodies. *J Immunol* (2005) 175(9): 5950-5957.

Mulder, A, M Kardol, J Blom, WB Jolley, CJ Melief and H Bruning. A human monoclonal antibody, produced following in vitro immunization, recognizing an epitope shared by HLA-A2 subtypes and HLA-A28. *Tissue Antigens* (1993) 42(1): 27-34.

Mulder, A, M Kardol, J Regan, R Buelow and F Claas. Reactivity of twenty-two cytotoxic human monoclonal HLA antibodies towards soluble HLA class I in an enzyme-linked immunosorbent assay (PRA-STAT). *Hum Immunol* (1997) 56(1-2): 106-113.

Mulder, A, MJ Kardol, CM Uit het Broek, J Tanke-Visser, NT Young and FH Claas. A human monoclonal antibody against HLA-Cw1 and a human monoclonal antibody against an HLA-A locus determinant derived from a single uniparous female. *Tissue Antigens* (1998) 52(4): 393-396.

Muller, C, S Liangru, M Schneider, A Ziegler and P Wernet. A cytotoxic monoclonal IgM antibody (Tu 101) directed against an antigenic determinant shared between the HLA-A allospecificities A2 and A28. *Hum Immunol* (1983) 6(4): 189-197.

Nakayama, T, K Ogasawara, H Ikeda, H Kunikane, M Kasahara, N Ishikawa, et al. A cytotoxic monoclonal antibody (HU-39) that detects DRw8 + DRw12. *Hum Immunol* (1987) 19(2): 117-126.

Navarette, C, C Brown, P de Lange and GMT Schreuder. 12th International Histocompatibility Workshop HLA class II monoclonal antibodies study. In: D Charron, editor. *HLA: Genetic diversity of HLA: Functional and Medical Implications Volume 1 - Proceedings of the Twelfth International Histocompatibility Workshop*. Paris, France: EDK (1997). p. 11-17.

Nelson, K, J Bodmer, A Martin, C Navarette and DM Strong. Micro EIA and Monoclonal Antibodies. In: B Dupont, editor. *Immunobiology of HLA Volume I: Histocompatibility Testing*. New York: Springer-Verlag (1989). p. 292-301.

Nordwig, H, WW Kwok and JP Johnson. Identification of the amino acid residues contributing to monoclonal antibody-defined DQw1 epitopes. *Hum Immunol* (1991) 31(2): 81-85.

Ogasawara, K, M Kasahara, T Nakayama, N Ishikawa, H Kunikane, S Hawkin, et al. A monoclonal antibody recognizing a polymorphic determinant on HLA-DR antigens except DR7 and DRw9. *Tissue Antigens* (1985) 26(5): 344-347.

Petersen, JS and T Dyrberg. Production of epitope specific monoclonal IgG antibodies to HLA class II molecules by combining in vivo and in vitro immunization. *J Immunol Methods* (1992) 151(1-2): 15-26.

Pistillo, MP, U Hämmerling, B Dupont and GB Ferrara. In vitro production of a human HLA alloantibody of restricted specificity (DQw2) via Epstein-Barr virus transformation. *Hum Immunol* (1986) 15(1): 109-117.

Pistillo, MP, RW Karr, E Klohe, O Mazzoleni and GB Ferrara. Use of transfectants to identify polymorphic epitopes recognized by human monoclonal antibodies. In: K Tsuji, M Aizawa and T Sasazuki, editors. *HLA 1991 - Proceedings of the Eleventh International Histocompatibility Workshop and Conference – Volume 2*. Oxford: Oxford University Press (1992). p. 413-415.

Pistillo, MP, O Mazzoleni, L Kun, M Falco, PL Tazzari and GB Ferrara. Production of two human hybridomas secreting antibodies to HLA-DRw11 and--DRw8+w12 specificities. *Hum Immunol* (1991) 31(2): 86-93.

Pistillo, MP, V Sguerso and GB Ferrara. High yields of anti-HLA human monoclonal antibodies can be provided by SCID mice. *Hum Immunol* (1992) 35(4): 256-259.

Radka, SF, KA Nelson and JV Johnston. HLA-DQw3-related determinants: analysis of subunit and spatial relationships. *Hum Immunol* (1989) 25(4): 225-236.

Radka, SF, SJ Stewart and SA Smith. Analysis of HLA-DQ molecules with a monoclonal antibody detecting a DQ polymorphism absent from DQW1 homozygous cells. *Hum Immunol* (1985) 14(3): 206-219.

Sadler, AM, JM Heyes, SG Marsh, P Krausa, GE Reynolds and JG Bodmer. The monoclonal antibody TAL16.1 recognizes the aspartic acid residue at position 70 in DRB gene products. *Tissue Antigens* (1993) 41(1): 42-46.

Sánchez, B, O de la Calle, J Yélamos, I Aguilera, F Sánchez, V Dessi, et al. A human monoclonal antibody reacting against HLA-DQ1-, DQ4-, and a subset of DQ7-bearing cells. *Hum Immunol* (1993) 36(2): 81-90.

Schreuder, GM, H Maeda, F Koning and J D'Amaro. TA10 and 2B3, two new alleles in the HLA-DQ region recognized by monoclonal antibodies. *Hum Immunol* (1986) 16(2): 127-136.

Tambur, AR, JR Leventhal, JJ Friedewald and DS Ramon. The complexity of human leukocyte antigen (HLA)-DQ antibodies and its effect on virtual crossmatching. *Transplantation* (2010) 90(10): 1117-1124.

Taylor, CJ, L Ugozzoli, N Tanigaki, R Tosi, M Bunce, A Ting, et al. Antigen Sociey #29 Report (DRw52). In: B Dupont, editor. *Immunobiology of HLA Volume I: Histocompatibility Testing* New York: Springer-Verlag (1989). p. 273-275.

- Thammanichanond, D, W Parapiboon, T Mongkolsuk, S Worawichawong, C Tammakorn and P Kitpoka. Acute Antibody-Mediated Rejection by De Novo Anti-HLA-DP $\beta$  and -DP $\alpha$  Antibodies After Kidney Transplantation: A Case Report. *Transplant Proc* (2018) 50(8): 2548-2552.
- Tongio, MM, I Doxiadis, M Laforet, GMT Schreuder, N Froelich, G Semana, et al. 12th International Histocompatibility Workshop HLA class I monoclonal antibodies study. In: D Charron, editor. *HLA: Genetic diversity of HLA: Functional and Medical Implications Volume 1 - Proceedings of the Twelfth International Histocompatibility Workshop*. Paris, France: EDK (1997). p. 7-11.
- Tongio, MM, E Van den Berg-Loonen, JD Bignon, D Chandanayingyong, A Dormoy, T Eiermann, et al. HLA-DP detected by serology. In: D Charron, editor. *HLA: Genetic diversity of HLA: Functional and Medical Implications Volume 2 - Proceedings of the Twelfth International Histocompatibility Conference*. Paris, France: EDK (1997). p. 135-138.
- Van den Berg-Loonen, EM, JD Bignon, E Du Toit, EM Pitchappan, J Loon, DP Singal, et al. AHS#11: HLA-DR2 (DR15, DR16), DR51. In: D Charron, editor. *HLA: Genetic diversity of HLA: Functional and Medical Implications Volume 1 - Proceedings of the Twelfth International Histocompatibility Workshop*. Paris, France: EDK (1997). p. 91-95.
- Viken, HD, G Gaudernack and E Thorsby. Characterization of a monoclonal antibody recognizing a polymorphic epitope mainly on HLA-DPw2 and DPw4 molecules. *Tissue Antigens* (1989) 34(4): 250-259.
- Viken, HD, G Paulsen, S Drover, WH Marshall, LM Sollid, G Gaudernack, et al. Influence on antibody recognition of amino acid substitutions in the cleft of HLA-DQ2 molecules. Suggestive evidence of peptide-dependent epitopes. *Hum Immunol* (1995a) 44(2): 63-69.
- Viken, HD, G Paulsen, LM Sollid, KE Lundin, GE Tjønnfjord, E Thorsby, et al. Characterization of an HLA-DQ2-specific monoclonal antibody. Influence of amino acid substitutions in DQ beta 1\*0202. *Hum Immunol* (1995b) 42(4): 319-327.
- Viken, HD, AB Thoresen, E Thorsby and T Hansen. The cytotoxic HLA-DQ3 reactive human hybridoma antibody 4166 that may distinguish DQ7 + 8 from DQ9. *Hum Immunol* (1995c) 42(4): 281-288.
- Viken, HD, E Thorsby and G Gaudernack. Characterization and epitope mapping of four HLA class II reactive mouse monoclonal antibodies using transfected L cells and human cells transfected with mutants of DQB1\*0302. *Tissue Antigens* (1995) 45(4): 250-257.
- Vilella, R, J Yague and J Vives. Monoclonal antibody against HLA-Aw32 + A25. Is HLA-Aw32 an allele with no unique antigenic determinant? *Hum Immunol* (1983) 6(1): 53-62.
- Vitale, M, MP Pistillo, PL Tazzari, M Falco, PF Sun, S Mantero, et al. Production and characterization of murine monoclonal antibodies recognizing HLA-DQ polymorphisms obtained by immunizing mice with transfected L cells. *Hum Immunol* (1992) 34(2): 126-134.
- Wölpl, A, T Halder, H Kalbacher, H Neumeyer, K Siemoneit, SF Goldmann, et al. Human monoclonal antibody with T-cell-like specificity recognizes MHC class I self-peptide presented by HLA-DR1 on activated cells. *Tissue Antigens* (1998) 51(3): 258-269.

Young, JA, J Lindsay, JG Bodmer and J Trowsdale. Epitope recognition by a DP alpha chain-specific monoclonal antibody (DP11.1) is influenced by the interaction between the DP alpha chain and its polymorphic DP beta chain partner. *Hum Immunol* (1988) 23(1): 37-44.

Youngs, D. DP alloantibodies. *ASHI Quarterly* (2004):60-62.

Youngs, D, P Warner, M Gallagher and I Gimferrer. New DQA1 allele specific antibody against epitope 2D (an exon 1 encoded amino acid). Considerations for alleles under the same P-group designation. *Transpl Immunol* (2018) 51: 32-39.
